# Supplementary material for: A two-gene random forest model to diagnose osteoarthritis based on RNA-binding protein-related genes in knee cartilage tissue
Source: Aging (Albany NY). 2023 Jan 5;15(1):193–212. doi: 10.18632/aging.204469 (PMC9876643; doi:10.18632/aging.204469)
Supplement: Supplementary Table 1 [file aging-15-204469-s003.xlsx]

## Sheet: All_limma
Supplementary Table 1. The genomic difference of the RBPs between control and OA samples.
gene	logFC	AveExpr	t	P.Value	FDR	B
NXT1	-1.37986	3.76125	-8.75856	1.35e-10	2.05e-07	14.1291
PELO	-1.21273	5.76739	-8.27573	5.56e-10	3.95e-07	12.7648
PDCD4	-0.982032	7.27067	-8.04038	1.12e-09	3.95e-07	12.0892
GEMIN4	-0.82028	4.66933	-8.01513	1.21e-09	3.95e-07	12.0163
GTPBP1	-0.923323	5.80217	-7.99207	1.3e-09	3.95e-07	11.9497
DDX24	-0.808554	7.89174	-7.86802	1.88e-09	4.78e-07	11.5903
FAM98A	1.1116	5.10379	7.65191	3.61e-09	7.87e-07	10.9601
CASC3	-0.834703	6.34857	-7.37819	8.31e-09	1.58e-06	10.1549
YTHDC1	-1.13552	7.15855	-7.26966	1.16e-08	1.77e-06	9.83362
SPEN	-1.03314	7.77935	-7.26963	1.16e-08	1.77e-06	9.83351
MEX3D	2.84313	1.25257	7.10384	1.93e-08	2.68e-06	9.34073
CCDC59	-0.862929	4.40217	-6.80522	4.86e-08	5.92e-06	8.44764
DCP1A	-0.522101	5.65244	-6.79317	5.04e-08	5.92e-06	8.41145
CTIF	-1.14845	5.29539	-6.69179	6.91e-08	7.53e-06	8.10676
PRPF38A	-0.860015	5.75648	-6.65822	7.67e-08	7.8e-06	8.00574
SNW1	-0.558442	5.79203	-6.50674	1.23e-07	1.17e-05	7.54909
GLTSCR2	-0.733108	7.28436	-6.40758	1.68e-07	1.5e-05	7.24958
LONP1	-0.873213	5.55957	-6.32087	2.2e-07	1.81e-05	6.98735
PAIP2B	-1.69058	3.8783	-6.31336	2.25e-07	1.81e-05	6.96462
PARS2	1.69057	0.84501	6.23086	2.91e-07	2.22e-05	6.71486
TIPARP	-1.94284	8.10221	-6.20163	3.19e-07	2.32e-05	6.62634
SRSF3	-0.869315	7.16354	-6.17567	3.46e-07	2.4e-05	6.5477
RNMT	-1.33364	6.42484	-6.00413	5.93e-07	3.69e-05	6.02768
ZMAT3	1.23209	4.68572	5.98381	6.32e-07	3.69e-05	5.96607
YARS	-0.913907	5.63271	-5.98143	6.37e-07	3.69e-05	5.95887
SARS	-0.87548	6.8851	-5.96992	6.6e-07	3.69e-05	5.92397
NOVA1	1.55887	4.67299	5.96685	6.66e-07	3.69e-05	5.91463
DHX33	0.667433	3.63932	5.96134	6.78e-07	3.69e-05	5.89794
RIOK3	-1.33858	6.20448	-5.89574	8.33e-07	4.38e-05	5.699
MAK16	0.575878	4.24677	5.71279	1.48e-06	7.52e-05	5.1443
FUBP1	-0.523825	7.15353	-5.66534	1.72e-06	8.44e-05	5.00052
SYF2	-0.698819	5.5246	-5.59972	2.11e-06	0.000100478	4.80177
EZH2	1.28778	1.82059	5.5421	2.53e-06	0.000113621	4.62738
UTP11L	0.799528	3.64293	5.54117	2.53e-06	0.000113621	4.62454
PLD6	-1.38769	1.79817	-5.53122	2.61e-06	0.000113871	4.59444
TIA1	0.822451	5.95401	5.4606	3.26e-06	0.000138119	4.38092
DDX27	-0.6535	5.32088	-5.37831	4.22e-06	0.000169054	4.1324
GNL1	-0.816346	5.87334	-5.37379	4.28e-06	0.000169054	4.11876
TRNAU1AP	-0.807371	4.02254	-5.37046	4.32e-06	0.000169054	4.1087
MCTS1	0.474753	5.28291	5.36185	4.44e-06	0.000169328	4.08272
MRPL3	0.54106	5.19929	5.31255	5.18e-06	0.000189421	3.93404
RBM7	-0.748187	5.00943	-5.31039	5.22e-06	0.000189421	3.92753
PRPF8	-0.56584	8.31652	-5.29783	5.43e-06	0.000192422	3.88968
GARS	-0.760939	6.74929	-5.2811	5.72e-06	0.00019814	3.83929
WDR46	0.47091	4.83387	5.27252	5.87e-06	0.000198996	3.81347
ZFP36	-2.31397	6.89988	-5.25843	6.14e-06	0.00020343	3.77104
CNBP	-0.510055	8.35108	-5.20424	7.27e-06	0.000235797	3.60801
PRDX1	1.13403	6.64556	5.15929	8.36e-06	0.000265625	3.47297
AEN	1.12803	3.06783	5.13657	8.97e-06	0.000273724	3.40477
CARS	-0.808995	5.37762	-5.13655	8.97e-06	0.000273724	3.40472
CTU1	1.11874	0.621186	5.00418	1.35e-05	0.000405089	3.00832
LSM14B	-0.808368	4.67529	-4.98788	1.43e-05	0.000410221	2.95962
MSL3	0.636312	3.58899	4.98774	1.43e-05	0.000410221	2.9592
RBM24	-2.56345	-0.345194	-4.96548	1.53e-05	0.000420529	2.89276
POLDIP3	-0.5374	6.19938	-4.9643	1.53e-05	0.000420529	2.88923
PATL1	-1.22377	5.06669	-4.96199	1.54e-05	0.000420529	2.88236
RBM39	-0.536782	8.20998	-4.94172	1.64e-05	0.000439968	2.82188
RPS27	-1.52963	2.97771	-4.92707	1.72e-05	0.00045246	2.77824
ZC3H7B	0.490658	5.57035	4.91583	1.78e-05	0.000460561	2.74474
EIF4A3	-1.07446	4.6324	-4.90449	1.85e-05	0.000469073	2.71098
DHX40	-0.549764	5.88271	-4.88441	1.96e-05	0.000490971	2.65123
ELAC2	0.744421	4.67005	4.85586	2.15e-05	0.000527656	2.56636
ZCCHC2	-0.771626	4.47051	-4.83305	2.3e-05	0.000557215	2.49862
CLK3	-1.1134	5.39363	-4.80814	2.49e-05	0.000592364	2.42473
AIMP1	-0.489471	5.73882	-4.80273	2.53e-05	0.000593082	2.40868
NIP7	1.40315	2.38459	4.79577	2.58e-05	0.000595293	2.38806
IPO13	1.10122	3.35444	4.7917	2.62e-05	0.000595293	2.376
SLU7	-0.507586	5.93547	-4.78595	2.66e-05	0.000597028	2.35898
RAE1	-0.488756	3.83495	-4.76567	2.83e-05	0.000618055	2.29894
NXF1	-0.51585	6.06614	-4.76533	2.84e-05	0.000618055	2.29792
MRPL49	-0.583811	4.95071	-4.75007	2.97e-05	0.000638682	2.25279
RNF113A	-0.996228	3.79912	-4.72239	3.24e-05	0.000685829	2.17101
APOBEC3H	-2.62648	-2.17318	-4.69835	3.49e-05	0.000728357	2.10005
MPHOSPH6	0.872288	2.59662	4.66338	3.88e-05	0.000800021	1.99699
DDX46	0.368055	6.07665	4.65206	4.02e-05	0.000817264	1.96367
ZCCHC5	1.49849	1.19959	4.62645	4.35e-05	0.000870911	1.88839
HNRNPC	-0.524115	7.10295	-4.62274	4.4e-05	0.000870911	1.87749
TOE1	-0.826855	3.27534	-4.60638	4.62e-05	0.000887572	1.82944
EIF4E2	1.09084	4.36264	4.60482	4.65e-05	0.000887572	1.82485
ZC3H12A	-1.37814	2.97344	-4.60408	4.66e-05	0.000887572	1.8227
AKAP8	-0.552357	5.20356	-4.57746	5.05e-05	0.000951032	1.74463
FMR1	-0.298139	5.83748	-4.57172	5.14e-05	0.000956069	1.72781
NXT2	1.07768	2.63356	4.55997	5.33e-05	0.000979092	1.69341
TARSL2	-0.583183	5.54506	-4.51689	6.08e-05	0.00110343	1.56747
GTF3A	0.91212	5.1337	4.46909	7.03e-05	0.00126139	1.42811
SUPT6H	-0.648483	6.9671	-4.43864	7.71e-05	0.00134891	1.33956
DDX50	-0.403072	5.88785	-4.43723	7.75e-05	0.00134891	1.33546
NOM1	0.768096	3.85416	4.43562	7.78e-05	0.00134891	1.33077
ERI2	1.07215	3.78997	4.42612	8.01e-05	0.00137277	1.3032
RPP40	1.19876	1.51232	4.39227	8.88e-05	0.00150433	1.20504
RUVBL1	0.886572	3.05116	4.35553	9.92e-05	0.0016597	1.09877
MRPL15	0.808522	3.49495	4.35255	0.000100126	0.0016597	1.09014
NAA38	0.41692	5.4512	4.33443	0.00010576	0.00172047	1.03786
PUM1	-0.501099	6.88879	-4.33353	0.000106049	0.00172047	1.03526
SART3	-0.494144	6.08248	-4.32259	0.000109613	0.00175957	1.0037
TEFM	0.949492	2.4444	4.31606	0.000111793	0.00176186	0.984894
TARS	-0.92787	5.88123	-4.31525	0.000112066	0.00176186	0.982572
RBM22	-0.870397	5.47723	-4.31052	0.000113678	0.00176897	0.968937
RBM45	0.918976	2.8831	4.30275	0.000116373	0.00179262	0.946571
MRPS11	0.855752	3.0912	4.2964	0.00011862	0.00180896	0.928318
NGDN	-0.60441	4.1627	-4.27362	0.000127048	0.0019183	0.862828
AKAP1	-0.859732	5.06338	-4.23729	0.00014171	0.0021187	0.758674
DENR	0.398664	4.89392	4.23234	0.000143834	0.00212958	0.744492
POLR1E	-0.755461	4.01455	-4.21281	0.000152512	0.00223636	0.688649
CELF2	1.7365	2.19814	4.19893	0.000158992	0.00230917	0.648998
SNRNP27	-0.409502	4.6372	-4.18662	0.000164965	0.00237331	0.613866
SMAD7	-0.920429	5.04051	-4.18137	0.000167578	0.00238838	0.598892
HNRNPA3	-0.417528	7.34002	-4.15049	0.000183785	0.00259511	0.510987
CARHSP1	-0.725007	5.52146	-4.13241	0.000193972	0.00270243	0.459634
ALKBH5	-0.721554	6.99005	-4.13076	0.000194929	0.00270243	0.45495
FDXACB1	1.77537	0.355216	4.11276	0.00020567	0.00282565	0.403912
RSL1D1	-0.632504	6.69857	-4.09625	0.000216031	0.00294149	0.357162
TRA2B	-0.851829	6.67895	-4.09081	0.000219558	0.00296306	0.341762
CLP1	1.52512	1.0774	4.07821	0.000227938	0.00304917	0.306144
DCAF13	0.732637	4.67059	4.06317	0.00023835	0.00316072	0.263684
EIF3I	-0.473476	5.88846	-4.01417	0.00027559	0.00362306	0.125758
PTGES3	-0.42778	6.51661	-3.98855	0.000297259	0.00387453	0.0539035
EIF2B2	-0.473342	3.93202	-3.9585	0.000324791	0.00413611	-0.0301427
ENOX1	1.29747	3.3262	3.95805	0.000325225	0.00413611	-0.0314093
SAMD4B	-0.436163	4.74753	-3.9578	0.000325465	0.00413611	-0.0321086
EIF3D	-0.497418	6.44509	-3.94811	0.000334885	0.00422065	-0.0591698
BCLAF1	-0.833397	7.98829	-3.92303	0.000360495	0.00450619	-0.129036
SAFB	-0.675922	5.23747	-3.91377	0.000370426	0.00459268	-0.154793
RNPC3	-0.507815	4.76908	-3.90182	0.000383637	0.00468862	-0.187997
KHDRBS1	-0.360157	6.82497	-3.90122	0.000384313	0.00468862	-0.189664
RBM14	-0.521521	5.48992	-3.89197	0.000394872	0.00477921	-0.215342
RSL24D1	-0.612147	6.05127	-3.88511	0.000402889	0.00483784	-0.234378
NPM1	-0.55596	7.19827	-3.88225	0.000406277	0.00484041	-0.242309
IGF2BP2	-0.73858	4.49492	-3.87355	0.000416743	0.00492662	-0.266394
ZC3HC1	0.514396	2.97576	3.86016	0.000433377	0.0050393	-0.303446
NOP58	-0.945834	5.54503	-3.85812	0.000435966	0.0050393	-0.309082
MRPS18A	-0.609932	2.99732	-3.85794	0.000436188	0.0050393	-0.309565
DNMT3B	1.23956	0.372121	3.84728	0.000449977	0.00515952	-0.33902
ZC3H7A	-0.758592	6.30127	-3.83824	0.000462005	0.00524158	-0.363978
WBP4	-0.347266	4.67712	-3.83675	0.000464008	0.00524158	-0.368072
DDX25	2.06737	0.490616	3.81709	0.000491361	0.00547766	-0.422246
AFF1	-0.743582	8.24844	-3.81492	0.000494464	0.00547766	-0.4282
ZC3H15	-0.343117	5.79054	-3.81408	0.000495683	0.00547766	-0.430528
PARP1	0.514473	5.01395	3.79632	0.000521938	0.0057263	-0.47932
CSTF2	0.65911	2.54638	3.79054	0.000530772	0.00578163	-0.495183
PRPF6	-0.579965	6.30347	-3.78597	0.000537863	0.00581731	-0.507723
RBM34	-0.320234	4.82385	-3.7691	0.000564825	0.0060659	-0.553934
PSIP1	-0.424876	6.51612	-3.76007	0.000579791	0.00618309	-0.578634
RBM8A	-0.671276	4.83502	-3.75096	0.000595278	0.00630416	-0.603525
PIWIL4	0.485024	5.474	3.72991	0.000632604	0.00665325	-0.66093
PABPC4L	1.11595	1.371	3.72454	0.000642489	0.00671094	-0.675561
MOV10	-0.933038	4.89004	-3.70898	0.000671971	0.00697113	-0.717884
MRPL11	0.461825	3.02734	3.68151	0.000727239	0.00740845	-0.792406
MRPS16	0.548098	5.29438	3.67963	0.000731162	0.00740845	-0.797476
CEBPZ	-0.677122	5.87981	-3.67888	0.00073275	0.00740845	-0.799521
ZCCHC8	-0.5418	4.78627	-3.6785	0.000733558	0.00740845	-0.80056
RBBP6	-0.553834	6.70373	-3.67298	0.000745269	0.00747721	-0.815485
SRP54	-0.811445	5.93174	-3.64696	0.000802988	0.00800364	-0.885751
ZFP36L1	-0.908932	7.17646	-3.642	0.000814476	0.00804337	-0.899127
NOL8	0.375681	5.39649	3.6407	0.000817523	0.00804337	-0.902643
YRDC	0.791873	2.41422	3.63319	0.000835271	0.00816531	-0.922861
DHX35	0.70756	3.39526	3.61568	0.000878111	0.00852942	-0.969931
DDX47	-0.613771	4.90111	-3.60272	0.000911184	0.00879466	-1.00471
POP1	0.759976	2.38281	3.59842	0.000922419	0.0088471	-1.01624
UPF2	-0.79313	6.19747	-3.58736	0.000951944	0.00907322	-1.04586
EXOG	0.638347	3.43797	3.58225	0.000965879	0.00914885	-1.05952
MEX3B	2.13286	-1.67547	3.5776	0.000978721	0.00921327	-1.07194
TDRKH	1.01912	0.841647	3.56977	0.00100076	0.00936293	-1.09286
MRPL47	0.55206	3.6676	3.55127	0.0010547	0.00980738	-1.14218
CLK1	-0.610695	7.67366	-3.53853	0.00109348	0.0101064	-1.17608
NUTF2	0.876477	4.03892	3.52094	0.00114923	0.0105577	-1.22276
SRSF7	-0.700877	6.6076	-3.51729	0.00116117	0.0106035	-1.23246
CD3EAP	1.11244	0.990164	3.51365	0.00117315	0.0106491	-1.24209
PPARGC1A	-0.736997	4.19547	-3.50941	0.0011873	0.0107138	-1.25333
CNOT8	-0.820051	6.63362	-3.50481	0.00120279	0.0107897	-1.26549
XAB2	-1.10505	3.80845	-3.47085	0.00132346	0.0118027	-1.35511
MTO1	-0.358944	4.60099	-3.45551	0.00138169	0.0121866	-1.39545
EIF1B	-0.665392	4.72867	-3.45531	0.00138248	0.0121866	-1.39598
HNRNPAB	0.746787	5.77738	3.45002	0.00140314	0.0122976	-1.40987
VARS	0.555092	4.44751	3.4422	0.00143422	0.0124695	-1.43038
AUH	-0.401013	3.68414	-3.4396	0.00144472	0.0124695	-1.43721
HNRNPD	-0.421573	6.39743	-3.43837	0.00144971	0.0124695	-1.44044
TARBP1	0.981783	3.35645	3.43606	0.00145911	0.0124695	-1.44648
SRP72	-0.392701	6.67954	-3.43495	0.00146364	0.0124695	-1.44939
SRSF5	-0.581726	8.41871	-3.43053	0.00148185	0.0125546	-1.46096
ZNHIT6	0.44332	5.69956	3.42042	0.00152435	0.0128433	-1.48741
RPF2	-0.478685	3.59063	-3.41739	0.00153729	0.0128812	-1.49532
NUPL2	0.644367	3.95248	3.39613	0.00163119	0.0135628	-1.55076
ELAC1	0.641902	2.4748	3.39498	0.00163644	0.0135628	-1.55376
CPEB4	-0.463155	6.486	-3.3817	0.00169806	0.0139891	-1.5883
MRPL30	0.248903	4.86383	3.37997	0.00170622	0.0139891	-1.59278
PNO1	0.454957	4.13282	3.37151	0.00174679	0.0142452	-1.61473
MAGOHB	0.383991	4.14902	3.3691	0.00175852	0.0142646	-1.62098
PEG10	-1.34105	1.95298	-3.36333	0.00178693	0.0144183	-1.63595
SF3A1	-0.436664	5.94407	-3.29684	0.00214729	0.0172349	-1.80728
ERN1	-1.34746	3.8232	-3.27623	0.00227242	0.0181436	-1.86002
CWC22	-0.353451	5.85115	-3.26521	0.00234217	0.0185175	-1.88816
TUT1	-0.408292	4.25118	-3.265	0.00234352	0.0185175	-1.88869
TEP1	0.627344	5.26392	3.25393	0.00241563	0.0189277	-1.91688
RBMS3	-0.605711	6.07687	-3.25323	0.00242026	0.0189277	-1.91867
RNASE1	3.37069	-0.419915	3.2343	0.00254874	0.0198308	-1.96676
KAT8	-0.529429	4.88492	-3.22183	0.0026369	0.0204125	-1.99835
PUS1	1.03672	2.34337	3.20375	0.00276992	0.021334	-2.04406
BAZ2A	-0.778735	6.48517	-3.20029	0.00279603	0.0213648	-2.05276
SRSF4	-0.613853	6.27444	-3.19852	0.00280953	0.0213648	-2.05724
FTSJ3	0.352534	5.08738	3.19768	0.00281595	0.0213648	-2.05936
ZCCHC11	-0.664555	6.5047	-3.19402	0.00284404	0.0214711	-2.06857
MARS2	1.32736	0.524908	3.18711	0.0028979	0.0216637	-2.08597
NUP153	-0.8629	6.2239	-3.1871	0.00289797	0.0216637	-2.08599
NFX1	-0.563483	6.07284	-3.1731	0.00300994	0.022391	-2.12116
PRR3	-0.592827	3.29702	-3.15493	0.00316152	0.0233911	-2.1667
TSFM	0.502625	3.71625	3.15335	0.00317505	0.0233911	-2.17066
RPL23A	-0.501411	5.82991	-3.14992	0.00320451	0.0234946	-2.17921
KHDRBS3	1.36068	-0.0164777	3.14211	0.00327273	0.02388	-2.19872
CPSF4L	-1.62095	-2.92182	-3.14023	0.00328935	0.0238869	-2.20341
AARS	-0.908146	5.90599	-3.12653	0.0034129	0.0246667	-2.23755
RPL9	-0.808358	4.14825	-3.12204	0.00345432	0.0248483	-2.24871
OAS1	2.1457	-1.61864	3.11741	0.00349753	0.025041	-2.26021
RBM20	-2.12597	-1.00287	-3.11177	0.00355088	0.0253042	-2.27421
DDX28	1.29772	1.58814	3.10305	0.00363495	0.0257824	-2.29585
RRS1	0.652779	2.38646	3.10132	0.00365181	0.0257824	-2.30013
LSM14A	-0.360081	6.92045	-3.09781	0.00368633	0.0259062	-2.30883
RPS20	-0.463106	7.3455	-3.09457	0.00371839	0.0260117	-2.31683
ZC3H6	-0.71173	6.61953	-3.07762	0.00389079	0.0270934	-2.3587
TXNL4A	0.935615	4.49179	3.07134	0.00395649	0.0274257	-2.37417
PRPF4	-0.232834	4.63619	-3.06557	0.00401789	0.0277252	-2.38838
TRIT1	-0.35834	3.99276	-3.06111	0.00406591	0.0279303	-2.39935
MRPL45	-0.5744	3.36831	-3.04179	0.00428019	0.0292703	-2.44673
SRSF11	-0.515899	7.41093	-3.03977	0.00430328	0.0292969	-2.45169
IFIT1	1.35291	3.53969	3.03246	0.0043875	0.0296572	-2.46956
SBDS	-1.2783	5.57099	-3.03087	0.00440603	0.0296572	-2.47345
MYEF2	2.07851	-1.57603	3.03014	0.00441455	0.0296572	-2.47523
EEF2K	0.432803	5.91763	3.0233	0.00449531	0.0300673	-2.49193
HENMT1	0.707403	2.54654	3.02042	0.00452975	0.0301654	-2.49896
DDX54	-0.342533	4.84794	-3.00598	0.00470604	0.0312031	-2.53412
MRPL35	0.478137	3.5324	3.0027	0.00474693	0.031338	-2.54209
DDX56	-0.494022	5.24645	-2.99881	0.00479595	0.0315251	-2.55154
CNOT6	0.413083	4.75293	2.99575	0.00483481	0.0316441	-2.55897
HNRNPU	-0.59516	8.71504	-2.98012	0.00503786	0.0328322	-2.59681
NAF1	-0.577553	3.53181	-2.97168	0.00515094	0.0333922	-2.61722
UBTF	0.529169	5.61395	2.97045	0.00516758	0.0333922	-2.62018
EIF5A2	0.514455	3.05069	2.96651	0.00522129	0.0335969	-2.62969
GSPT2	0.366557	3.21351	2.95676	0.00535656	0.0343225	-2.65319
ERN2	1.76604	-2.41604	2.95214	0.00542184	0.0345954	-2.66431
SUPV3L1	-0.457898	3.75746	-2.93016	0.00574244	0.0364884	-2.71704
POP4	0.643273	3.51423	2.91043	0.00604534	0.0382537	-2.76417
EIF3H	-0.328906	7.12117	-2.90157	0.00618613	0.0389828	-2.78526
GLE1	0.412192	4.00932	2.89984	0.00621393	0.0389969	-2.78937
MTRF1	0.471985	2.97117	2.88983	0.0063775	0.0398079	-2.81316
PABPC4	-0.565286	6.43136	-2.88875	0.00639536	0.0398079	-2.81572
MRPL10	-0.514747	3.68134	-2.88529	0.00645299	0.0400033	-2.82393
DIS3	-0.950516	6.38518	-2.86624	0.00677883	0.0418531	-2.869
ENOX2	0.425915	3.61114	2.8625	0.00684456	0.0420885	-2.87782
PPARGC1B	1.84721	-0.268711	2.85491	0.00697986	0.0427481	-2.89571
SMG6	-0.740954	5.28709	-2.8507	0.00705594	0.0430412	-2.90562
GNL2	0.380199	5.11027	2.84821	0.00710144	0.0430696	-2.91149
RPL24	-0.465248	7.80905	-2.84735	0.00711708	0.0430696	-2.9135
EXO1	1.27562	-0.63042	2.83924	0.00726706	0.0438034	-2.93254
DGCR8	0.432754	4.66008	2.83063	0.00742952	0.0445121	-2.95273
BAZ2B	-0.373629	6.83473	-2.82993	0.007443	0.0445121	-2.95438
SMNDC1	-0.386167	5.0876	-2.82165	0.00760256	0.0451331	-2.97374
ZNF239	0.619181	2.06064	2.82148	0.00760603	0.0451331	-2.97415
SMAD3	-0.459646	6.54718	-2.81044	0.00782406	0.04619	-2.99992
SRSF6	0.391098	7.6447	2.8094	0.00784472	0.04619	-3.00233
ZNF622	-0.658408	4.4762	-2.80555	0.0079224	0.0464679	-3.01131
GNL3L	0.531987	5.65687	2.79896	0.00805693	0.0470759	-3.02665
CPEB3	-0.564622	4.79444	-2.79362	0.00816744	0.0475395	-3.03906
IGHMBP2	-0.376797	4.22948	-2.78815	0.0082821	0.0479715	-3.05176
SIDT2	-0.452672	5.14615	-2.78708	0.00830457	0.0479715	-3.05423
TDRD5	1.45646	-0.381865	2.78396	0.00837084	0.0480701	-3.06146
TRMT13	0.427582	4.52066	2.78256	0.00840076	0.0480701	-3.06471
ASCC1	-0.797084	4.03786	-2.78184	0.00841621	0.0480701	-3.06638
RBM4	-0.271739	5.21197	-2.77927	0.00847144	0.048205	-3.07234
C12orf65	-0.565156	3.432	-2.7729	0.00860958	0.048809	-3.08705
CNOT11	0.479564	3.92449	2.76951	0.00868408	0.0489326	-3.09489
RPL36A	-0.718544	2.70148	-2.76897	0.0086959	0.0489326	-3.09613
EIF1	-0.723457	8.67389	-2.76754	0.00872764	0.0489326	-3.09944
NOP10	0.899752	3.77566	2.75658	0.00897359	0.0501272	-3.12471
MRPS36	0.359655	2.52454	2.74792	0.00917234	0.0507628	-3.14462
FTSJ2	0.57897	3.87514	2.74741	0.00918422	0.0507628	-3.14579
G3BP2	-0.352655	6.91927	-2.74566	0.00922499	0.0507628	-3.14981
MECP2	-0.561547	6.06354	-2.74541	0.00923086	0.0507628	-3.15039
C17orf85	0.246036	5.4899	2.74443	0.00925381	0.0507628	-3.15265
NOL6	0.402944	4.49527	2.74133	0.00932637	0.0509775	-3.15974
DNMT1	0.512718	5.02252	2.73909	0.00937937	0.0510733	-3.16489
DDX17	-0.258607	9.4736	-2.73776	0.00941088	0.0510733	-3.16793
GPATCH8	-0.510494	6.8492	-2.73326	0.00951831	0.051196	-3.17824
GEMIN6	0.981527	1.6682	2.7332	0.00951997	0.051196	-3.17839
IFIT2	0.913403	1.35823	2.73204	0.0095477	0.051196	-3.18103
BRIX1	-0.353286	4.71704	-2.73121	0.00956777	0.051196	-3.18294
N4BP1	-0.504147	5.61858	-2.72971	0.00960394	0.0512098	-3.18636
CPSF3	0.358942	4.0935	2.72745	0.00965895	0.0512479	-3.19155
R3HCC1	-0.642962	3.97247	-2.72665	0.00967829	0.0512479	-3.19336
GAR1	0.525187	2.56257	2.71857	0.00987722	0.0521203	-3.21182
RBM15	-0.487408	4.81306	-2.70369	0.0102534	0.0539185	-3.2457
LSM1	1.0047	4.43653	2.68485	0.0107489	0.0559947	-3.28843
TRA2A	-0.359075	5.55675	-2.68452	0.0107577	0.0559947	-3.28918
PABPN1L	1.44795	-1.8802	2.68449	0.0107583	0.0559947	-3.28923
RBM25	-0.3981	7.11471	-2.67722	0.0109557	0.0568279	-3.30568
RBPMS2	-1.14965	2.46084	-2.67444	0.011032	0.0570298	-3.31196
LAS1L	-0.349162	4.95595	-2.66341	0.0113392	0.0583822	-3.33679
RPUSD1	0.815389	2.25081	2.66232	0.0113702	0.0583822	-3.33926
ZCRB1	0.321518	5.10077	2.63193	0.012261	0.0627449	-3.40736
ADAT2	0.437282	3.02705	2.62796	0.0123819	0.0631116	-3.41621
ATXN1L	-0.287928	5.7023	-2.62587	0.012446	0.0631116	-3.42087
ERI1	0.687141	4.00936	2.62552	0.0124568	0.0631116	-3.42165
DDX42	-0.227163	7.11251	-2.61885	0.0126638	0.0639478	-3.4365
TSEN15	0.91047	3.20226	2.61567	0.0127635	0.0642385	-3.44357
MRPL13	0.587197	3.12128	2.61075	0.0129194	0.0648095	-3.45451
EIF5AL1	0.709443	2.49758	2.6052	0.0130972	0.0654859	-3.46682
RAN	0.460354	5.65704	2.5908	0.013569	0.0676235	-3.49867
MRPL1	0.267161	3.3196	2.58823	0.0136549	0.0678296	-3.50435
DEK	-0.374337	7.30626	-2.58154	0.0138808	0.068728	-3.5191
RRP12	-0.514777	4.64224	-2.57691	0.0140389	0.069286	-3.52928
SUPT5H	-0.52934	6.40807	-2.5739	0.0141427	0.0693851	-3.5359
SF1	-0.353344	7.14749	-2.57324	0.0141655	0.0693851	-3.53735
LUC7L3	-0.374491	7.49586	-2.57185	0.014214	0.0693851	-3.54042
PTBP2	-0.309092	5.22955	-2.57107	0.014241	0.0693851	-3.54213
MRPL42	0.398301	4.67417	2.56882	0.0143197	0.0695462	-3.54708
DDX53	1.36976	-3.36263	2.56652	0.0144003	0.0697156	-3.55212
HNRNPF	-0.196127	6.26896	-2.56247	0.0145433	0.070165	-3.56099
DHX15	-0.344857	6.91607	-2.5613	0.0145851	0.070165	-3.56357
EIF4E	0.449607	3.7986	2.55777	0.0147109	0.0705477	-3.57128
MRPL39	-0.796895	3.56075	-2.53925	0.0153894	0.07357	-3.61172
RBM27	-0.497538	6.20299	-2.52956	0.0157555	0.0750849	-3.63279
DDX51	-0.466369	4.31739	-2.52787	0.0158202	0.0751584	-3.63646
DAZL	1.54847	-2.40347	2.52589	0.0158965	0.0752823	-3.64077
RNASEL	0.628792	3.94859	2.52463	0.015945	0.0752823	-3.6435
TRMT11	-0.463311	4.97397	-2.51877	0.0161725	0.0761207	-3.65618
TNRC6C	-0.307456	6.0159	-2.51718	0.0162349	0.0761792	-3.65963
PRPF3	-0.883057	5.35202	-2.51542	0.0163044	0.0762704	-3.66345
RPS18	-0.710943	7.91938	-2.51007	0.0165164	0.0770259	-3.67501
DNTTIP2	-0.468257	5.44129	-2.50606	0.0166771	0.077273	-3.68367
UTP18	-0.398436	4.74294	-2.5056	0.0166956	0.077273	-3.68466
IGF2BP3	0.98009	0.721522	2.50496	0.0167214	0.077273	-3.68604
RPL30	-0.493692	8.32551	-2.50043	0.016905	0.0778856	-3.69581
UNKL	-0.402267	3.86397	-2.48652	0.0174803	0.0799828	-3.7257
EIF3L	-0.369056	7.95358	-2.48643	0.0174842	0.0799828	-3.7259
YBX2	-1.51352	-2.4796	-2.48496	0.0175461	0.0799828	-3.72906
RPS6	-0.431027	10.0848	-2.48439	0.01757	0.0799828	-3.73027
PIN4	0.684786	3.49188	2.4824	0.017654	0.080126	-3.73453
DDX19B	-0.311418	3.40882	-2.47742	0.0178663	0.0808491	-3.7452
SCAF4	-0.501245	4.74504	-2.46924	0.0182199	0.0822054	-3.76269
RBM43	-1.31382	3.69136	-2.45988	0.0186325	0.0838188	-3.78265
CNP	0.331706	5.06246	2.45627	0.0187938	0.0841679	-3.79033
TRMT61A	-0.500442	3.15861	-2.45567	0.0188205	0.0841679	-3.79159
RC3H1	0.404862	6.13269	2.43123	0.0199481	0.0888586	-3.84338
SAFB2	-0.514866	6.05068	-2.43043	0.0199859	0.0888586	-3.84507
PABPC1	-0.315551	8.05688	-2.42045	0.0204647	0.0907227	-3.86611
PIWIL2	-0.771042	2.99895	-2.41646	0.0206592	0.0913198	-3.87452
BCDIN3D	0.440518	2.08708	2.41334	0.0208122	0.09173	-3.88107
CNOT1	-0.416957	7.38685	-2.41021	0.0209667	0.0921446	-3.88763
EEF1G	-0.35767	8.23733	-2.40842	0.0210554	0.0922002	-3.89138
RNMTL1	-0.942843	2.42887	-2.40682	0.0211353	0.0922002	-3.89474
IPO7	0.355422	6.50074	2.40578	0.021187	0.0922002	-3.89691
RPL13	-0.503666	8.64714	-2.4051	0.0212212	0.0922002	-3.89834
LUC7L2	-1.17437	3.33005	-2.39856	0.0215513	0.0933684	-3.91203
MPHOSPH10	-0.251488	5.66326	-2.39582	0.0216908	0.093688	-3.91776
SRRM3	1.15973	0.282854	2.3947	0.0217479	0.093688	-3.92009
URB2	0.933291	2.47087	2.39049	0.0219648	0.0942389	-3.92889
XPO5	0.397808	4.91558	2.38898	0.022043	0.0942389	-3.93204
MRTO4	0.324543	3.49497	2.38863	0.0220612	0.0942389	-3.93277
MKRN1	-0.375438	5.66145	-2.37861	0.0225867	0.0962141	-3.95362
PHF5A	0.584881	3.2625	2.37652	0.0226978	0.0964181	-3.95796
TSNAX	-0.345759	4.64905	-2.37507	0.0227748	0.0964764	-3.96096
RPL10	-0.748165	7.21536	-2.3719	0.0229446	0.0969267	-3.96754
USB1	0.515757	2.71797	2.36895	0.0231037	0.0971168	-3.97365
ZFR	-0.67507	6.8596	-2.36871	0.023117	0.0971168	-3.97416
MRPL2	-0.442684	3.84527	-2.36385	0.0233811	0.0979565	-3.98421
RPP38	0.438785	2.65742	2.35545	0.0238446	0.0994682	-4.00156
PIH1D1	-0.615337	3.87396	-2.35495	0.0238724	0.0994682	-4.00259
SRSF10	-0.282085	6.85979	-2.34106	0.0246582	0.102194	-4.0312
CCNT1	-0.508454	5.91991	-2.34102	0.0246605	0.102194	-4.03128
RBM12	-0.467055	6.42965	-2.33838	0.0248119	0.102543	-4.03668
SAMHD1	1.25014	0.719187	2.33683	0.024902	0.102637	-4.03988
HEXIM1	-0.226013	5.92668	-2.33498	0.0250089	0.1028	-4.04366
NOP56	0.298006	5.10112	2.33293	0.0251285	0.103011	-4.04787
ALYREF	0.39197	4.57091	2.33178	0.0251954	0.103011	-4.05021
SF3B1	-0.201278	8.79805	-2.31923	0.0259395	0.10577	-4.07587
TLR8	1.46682	-2.73899	2.31394	0.0262591	0.106787	-4.08665
AGO2	-0.831149	4.77832	-2.31241	0.0263519	0.106879	-4.08976
KHDC1L	1.32731	-1.95813	2.31078	0.0264513	0.106998	-4.09308
SREK1	-0.311896	7.2466	-2.30489	0.0268138	0.108177	-4.10505
PPRC1	0.430527	4.49177	2.29916	0.02717	0.109325	-4.11666
ENDOU	-0.886712	0.149465	-2.29248	0.0275912	0.110728	-4.13019
TDRD3	-0.508449	5.84619	-2.28747	0.0279112	0.111718	-4.14032
LRRFIP1	-0.266136	7.35244	-2.28483	0.0280811	0.112104	-4.14565
SRRM1	-0.538735	6.17491	-2.28279	0.0282125	0.11221	-4.14975
PNLDC1	1.51283	-2.18353	2.28214	0.0282547	0.11221	-4.15106
LSG1	-0.424486	4.91706	-2.27947	0.028428	0.112359	-4.15643
REXO4	-0.266677	3.74706	-2.27919	0.0284465	0.112359	-4.157
PHRF1	-0.289715	5.35282	-2.27722	0.028575	0.112359	-4.16096
EIF4B	-0.929303	7.70188	-2.27574	0.0286724	0.112359	-4.16395
MRPL50	0.389579	3.14485	2.27561	0.0286808	0.112359	-4.1642
MRPL12	0.638592	2.89891	2.2748	0.0287345	0.112359	-4.16584
IFIT1B	1.30389	-2.13118	2.27024	0.0290358	0.113247	-4.175
SRSF12	-0.446674	2.30569	-2.26065	0.0296791	0.115461	-4.19421
YTHDF3	0.389373	6.01874	2.25879	0.0298054	0.115657	-4.19793
ZNF598	0.672485	3.75054	2.24935	0.0304537	0.117873	-4.21678
RPLP1	-0.359152	7.34396	-2.24467	0.03078	0.118694	-4.2261
MATR3	-0.438092	8.15908	-2.24408	0.0308215	0.118694	-4.22728
FUBP3	0.237529	5.41047	2.23985	0.0311189	0.119522	-4.23568
XPOT	-0.409008	6.7591	-2.23786	0.0312602	0.119522	-4.23965
EXOSC7	-0.341978	4.27353	-2.23732	0.0312983	0.119522	-4.24071
EEF1E1	0.599545	2.52103	2.2366	0.03135	0.119522	-4.24215
HNRNPH1	-0.303064	8.71388	-2.23538	0.0314369	0.119554	-4.24457
TRMT2A	-0.309656	4.48621	-2.23359	0.0315643	0.11974	-4.24811
EIF4E3	-0.524916	5.21168	-2.2235	0.0322944	0.122206	-4.26809
SUGP2	0.295561	6.05835	2.2179	0.0327061	0.123458	-4.27915
PABPC5	-0.473226	2.41589	-2.21437	0.0329677	0.124137	-4.2861
RPL10A	-0.376126	7.63011	-2.21328	0.033049	0.124137	-4.28825
PINX1	-0.971722	1.74334	-2.21059	0.0332497	0.124584	-4.29353
OAS2	1.43365	-0.383519	2.20436	0.0337202	0.125815	-4.30578
NOP14	-0.331578	4.98346	-2.20406	0.0337433	0.125815	-4.30638
CWF19L1	-0.306159	4.63184	-2.19858	0.0341615	0.126931	-4.31711
TLR7	1.49522	-2.57388	2.19796	0.034209	0.126931	-4.31832
PAPD5	0.285172	4.60815	2.19614	0.0343494	0.127143	-4.32189
SCAF8	-0.669512	6.51533	-2.19418	0.0345008	0.127394	-4.32572
SMAD1	-0.488682	3.87393	-2.19158	0.0347028	0.12783	-4.3308
CNOT2	-0.239268	6.37229	-2.18772	0.0350049	0.128633	-4.33835
PWP2	0.2674	3.63217	2.18423	0.0352799	0.129331	-4.34515
THOC3	0.741023	1.29948	2.18295	0.0353814	0.129392	-4.34765
XPO6	0.22988	5.31258	2.17956	0.0356505	0.130064	-4.35424
ACO1	-0.602497	4.99543	-2.17818	0.0357613	0.130158	-4.35694
MRPS7	0.300364	3.73883	2.17406	0.0360921	0.130872	-4.36494
TARBP2	0.400221	2.26977	2.17331	0.0361527	0.130872	-4.3664
LRPPRC	-0.522281	6.60911	-2.17199	0.036259	0.130872	-4.36895
SART1	-0.458953	5.30733	-2.17148	0.0363009	0.130872	-4.36995
CCDC86	-0.58078	2.45255	-2.16839	0.0365517	0.131465	-4.37594
AFF4	-0.624446	7.75142	-2.16465	0.0368581	0.132255	-4.38318
RPL17	-0.488923	3.76016	-2.16145	0.0371222	0.132808	-4.38938
EEF1B2	-0.643842	5.68264	-2.16048	0.0372024	0.132808	-4.39125
HELZ	-0.560928	6.66405	-2.15914	0.0373135	0.132808	-4.39384
SNIP1	-0.294016	4.344	-2.15845	0.0373705	0.132808	-4.39517
LCMT2	0.312324	3.7938	2.15753	0.0374474	0.132808	-4.39695
RPS14	-0.543036	7.88729	-2.15434	0.0377139	0.133442	-4.4031
DIS3L	0.494395	4.89898	2.14157	0.038799	0.136724	-4.42768
FASTKD5	0.381877	3.63384	2.14131	0.0388206	0.136724	-4.42817
TSR2	-0.296698	4.51311	-2.13841	0.0390714	0.13729	-4.43374
NAT10	-0.24049	4.83901	-2.1358	0.0392973	0.137766	-4.43873
CWF19L2	-0.610544	5.4347	-2.12957	0.0398427	0.139132	-4.45066
NOL3	-0.606582	5.23515	-2.12921	0.0398747	0.139132	-4.45135
GTPBP3	0.826455	3.19354	2.12723	0.0400491	0.139132	-4.45513
ZNF638	-0.492566	8.01012	-2.12682	0.0400856	0.139132	-4.45591
SNRNP40	0.360942	3.74974	2.12617	0.0401431	0.139132	-4.45715
DARS	-0.335366	7.11647	-2.12368	0.0403646	0.139583	-4.46191
RBM48	0.310582	3.65747	2.12133	0.0405743	0.139991	-4.46639
MEPCE	-0.423507	4.75276	-2.11865	0.0408147	0.140502	-4.47149
ZRANB2	-0.259607	7.5116	-2.11755	0.0409133	0.140524	-4.47358
SETD7	0.255229	7.8746	2.11504	0.0411398	0.140985	-4.47835
GTF2F1	-0.386476	5.5969	-2.11354	0.0412758	0.141052	-4.4812
POLR2A	-0.488189	7.69236	-2.11279	0.0413444	0.141052	-4.48263
SON	-0.399363	8.56294	-2.10555	0.0420075	0.142767	-4.49636
LARP4	0.290802	5.81802	2.10526	0.0420343	0.142767	-4.49691
RBM41	0.258028	4.90868	2.10287	0.0422552	0.143198	-4.50143
CDC5L	-0.747081	5.67371	-2.09826	0.0426851	0.144334	-4.51016
PES1	-0.301135	5.12428	-2.09551	0.0429421	0.144882	-4.51534
LSM4	0.584365	4.2285	2.09166	0.043306	0.145787	-4.52261
AZGP1	-1.6528	-2.21054	-2.08562	0.0438818	0.1474	-4.53398
METTL1	0.514877	2.83454	2.08125	0.0443018	0.147746	-4.54218
WDR12	0.432556	3.12224	2.08074	0.0443515	0.147746	-4.54314
HABP4	-0.297406	4.74448	-2.08045	0.0443791	0.147746	-4.54368
DROSHA	0.249829	5.76515	2.08041	0.044383	0.147746	-4.54375
PAPOLA	0.193505	7.61342	2.07953	0.0444691	0.147746	-4.54542
EBNA1BP2	0.364396	4.1916	2.07525	0.0448851	0.148722	-4.55343
SPATS2L	0.380861	6.01614	2.07451	0.0449578	0.148722	-4.55482
CSDC2	-0.877835	1.20663	-2.07085	0.0453178	0.149588	-4.56168
FAM46A	0.816562	7.64879	2.06502	0.0458958	0.151169	-4.57256
R3HCC1L	-0.81996	3.87805	-2.06296	0.0461008	0.151517	-4.57639
LSM7	0.978179	3.49338	2.05436	0.0469693	0.154015	-4.59241
EIF4H	-0.571193	6.03419	-2.05344	0.0470629	0.154015	-4.59412
NONO	-0.453254	6.85396	-2.04985	0.0474298	0.154694	-4.60078
RBPMS	0.478011	3.96758	2.04943	0.0474733	0.154694	-4.60156
MBNL1	-0.252725	8.76489	-2.04384	0.0480495	0.156238	-4.6119
EIF3M	-1.11452	5.00214	-2.03957	0.0484946	0.15735	-4.6198
GEMIN2	0.584257	1.75775	2.03695	0.0487702	0.157908	-4.62465
NPM3	0.661355	2.82117	2.0309	0.049409	0.159637	-4.63579
GSPT1	0.219765	6.7686	2.02837	0.0496788	0.160169	-4.64044
NXF3	1.21342	-2.21101	2.02313	0.0502421	0.161465	-4.65008
CPEB2	0.442414	4.93581	2.02266	0.0502923	0.161465	-4.65094
HTATSF1	0.202776	6.07256	2.01959	0.0506251	0.162192	-4.65657
PRPF19	-0.443228	4.94553	-2.0169	0.0509183	0.162514	-4.6615
PAIP2	-0.228558	6.13662	-2.01671	0.0509387	0.162514	-4.66185
INTS6	-0.545051	5.58826	-2.01403	0.0512315	0.163106	-4.66674
SURF6	-0.238279	4.75456	-2.01195	0.0514612	0.163496	-4.67056
LARP6	-0.474219	5.17261	-2.00941	0.0517415	0.164045	-4.67519
HEXIM2	0.354226	2.01141	2.00777	0.0519235	0.164281	-4.67819
TSEN34	-0.350347	3.41812	-2.00334	0.0524172	0.165499	-4.68626
PNPT1	0.609251	3.77624	1.999	0.0529045	0.166693	-4.69415
C11orf68	-0.337418	3.67879	-1.98473	0.054537	0.171482	-4.72002
PAN3	-0.432287	5.70641	-1.98172	0.0548871	0.172228	-4.72546
RPUSD2	0.376502	2.02596	1.98028	0.0550543	0.172398	-4.72805
NOL9	0.225126	4.73849	1.97872	0.0552372	0.172616	-4.73087
MRPL37	-0.489999	3.95923	-1.97551	0.0556141	0.173439	-4.73665
NOLC1	-0.492973	5.27228	-1.96804	0.0565014	0.175846	-4.75009
TNPO2	-0.262435	5.43618	-1.96398	0.0569876	0.176998	-4.75736
BOLL	1.16459	-2.477	1.96128	0.0573142	0.177651	-4.76221
EIF2AK4	0.534957	5.05178	1.95736	0.0577895	0.178695	-4.76921
ADAT1	0.609569	3.53773	1.95657	0.0578853	0.178695	-4.77061
DDX39A	0.388803	3.36826	1.9537	0.0582369	0.179417	-4.77574
RNASEH2B	-0.298371	4.15021	-1.94328	0.059527	0.183021	-4.7943
PCBP4	0.395464	3.72433	1.93725	0.0602846	0.184685	-4.80499
SMG5	-0.236582	5.44007	-1.93705	0.0603102	0.184685	-4.80535
MRPS30	-0.245078	4.27189	-1.93575	0.0604755	0.18482	-4.80766
FBL	-0.583828	6.09496	-1.93118	0.0610563	0.185905	-4.81574
EIF3G	-0.458488	5.78003	-1.93104	0.0610743	0.185905	-4.81599
RPS25	-0.746251	7.61689	-1.92787	0.0614805	0.186769	-4.82159
MRPL18	0.35317	3.5547	1.92561	0.0617718	0.18728	-4.82558
RPUSD4	-0.297967	4.02824	-1.92249	0.0621752	0.188129	-4.83107
POLR2B	0.391978	6.04866	1.91955	0.0625576	0.188666	-4.83625
MRPS23	0.408176	3.88039	1.91923	0.0626001	0.188666	-4.83682
TXNL4B	-0.361338	3.08279	-1.91713	0.062875	0.189121	-4.84051
TOP1	-0.413658	5.92065	-1.91098	0.0636847	0.191179	-4.8513
SPATS2	-0.228184	5.48654	-1.90713	0.0641967	0.192338	-4.85804
PRPF39	0.211816	5.73623	1.90374	0.0646506	0.192674	-4.86397
NYNRIN	0.478791	5.11847	1.90372	0.0646529	0.192674	-4.864
ATXN2	-0.380033	6.06562	-1.9028	0.064777	0.192674	-4.86562
TRMT10A	-0.256144	3.19497	-1.90231	0.0648431	0.192674	-4.86648
SMAD9	-0.503543	5.5958	-1.90158	0.0649406	0.192674	-4.86774
AFF2	1.0053	1.13695	1.89464	0.0658813	0.195086	-4.87984
AKAP8L	-0.508051	4.9809	-1.89159	0.0662991	0.195573	-4.88515
ZCCHC7	-0.530065	5.05794	-1.89156	0.0663024	0.195573	-4.88519
RRP36	0.264271	4.34059	1.88254	0.0675496	0.198867	-4.90084
MVP	0.253902	6.20559	1.87662	0.0683795	0.200922	-4.91108
MRPL16	0.595518	3.72711	1.87407	0.0687388	0.20159	-4.91547
A1CF	0.871275	0.119076	1.86979	0.0693464	0.202981	-4.92285
THOC2	-0.239376	6.49554	-1.86567	0.0699355	0.203701	-4.92993
GPKOW	-0.181802	3.83734	-1.86532	0.0699862	0.203701	-4.93054
OAS3	0.908866	1.09592	1.86527	0.069993	0.203701	-4.93062
MRPS22	0.235668	4.36303	1.86228	0.0704243	0.20443	-4.93576
EIF2D	-0.283804	5.43738	-1.86167	0.0705117	0.20443	-4.9368
GEMIN5	-0.546142	5.37691	-1.85152	0.0719925	0.208327	-4.95417
RRP1B	0.194293	4.91791	1.84888	0.0723812	0.208984	-4.95867
GTPBP2	-0.378577	4.56739	-1.8478	0.0725414	0.208984	-4.96052
ESRP2	-0.435454	1.5331	-1.8472	0.0726306	0.208984	-4.96155
SARS2	0.397511	1.94279	1.836	0.0743069	0.213405	-4.98058
RPL18A	-0.985773	3.00198	-1.83167	0.0749641	0.214888	-4.98792
METTL14	-0.600592	4.39881	-1.82998	0.0752217	0.215054	-4.99078
EIF4G2	0.398292	8.88036	1.82944	0.0753041	0.215054	-4.99169
POLR2K	0.595015	4.76655	1.82825	0.0754866	0.215172	-4.9937
METTL3	-1.02779	4.15346	-1.82334	0.0762413	0.216902	-5.00198
APTX	-0.172043	4.44761	-1.82246	0.0763778	0.216902	-5.00347
CALR	0.275129	9.05683	1.81915	0.0768913	0.217954	-5.00904
GPATCH4	0.442428	3.80757	1.81673	0.0772687	0.218617	-5.01311
CACTIN	-0.326898	3.23181	-1.81134	0.0781145	0.220601	-5.02216
EDC4	-0.209576	4.49726	-1.80592	0.0789733	0.222614	-5.03124
NOP9	-0.752863	2.91799	-1.80205	0.0795918	0.223944	-5.03771
XPO1	-0.655893	6.59113	-1.80112	0.0797402	0.223948	-5.03925
RPL22L1	-0.371968	4.0432	-1.79513	0.0807073	0.225758	-5.04924
MTRF1L	0.307932	3.49808	1.79487	0.0807493	0.225758	-5.04967
KIN	0.229844	3.92349	1.79438	0.0808288	0.225758	-5.05049
DDX3Y	-3.00659	4.24553	-1.79045	0.0814694	0.22689	-5.05703
IFIT5	-0.467864	4.36624	-1.79007	0.0815317	0.22689	-5.05766
IFIH1	-0.396901	2.78003	-1.78824	0.0818303	0.227306	-5.06068
PAPD7	-0.320116	5.72619	-1.78605	0.082191	0.227893	-5.06432
MBNL2	-0.163453	7.08367	-1.78418	0.0824991	0.228332	-5.06742
IPO8	0.204	5.79611	1.78087	0.0830473	0.229433	-5.07289
DAP3	0.171113	4.80085	1.77978	0.0832285	0.229518	-5.07469
RPL29	-0.594754	6.9601	-1.76405	0.0858813	0.236406	-5.10059
ZNF326	-0.214727	5.27102	-1.76081	0.0864354	0.237503	-5.10589
MKRN3	1.21239	-2.21542	1.75811	0.0869012	0.238353	-5.11032
DHX29	0.350713	5.22766	1.75525	0.0873946	0.239276	-5.11498
POP5	0.681883	4.04165	1.75189	0.0879786	0.240443	-5.12046
ASH1L	-0.563502	7.74015	-1.7503	0.0882564	0.240771	-5.12306
MRPL9	-0.386867	3.73874	-1.74876	0.0885263	0.241076	-5.12557
RBMX2	-0.197268	3.81728	-1.7463	0.0889579	0.24182	-5.12957
AGO4	0.304799	4.95671	1.74462	0.0892538	0.241875	-5.13229
RRP7A	-0.341372	4.7224	-1.74439	0.0892956	0.241875	-5.13268
TFB2M	0.432747	2.75201	1.73802	0.0904251	0.244501	-5.143
MTIF2	0.20187	4.78221	1.73648	0.0907005	0.244811	-5.1455
THOC5	-0.225563	4.44968	-1.73463	0.0910324	0.245226	-5.14849
MRPL19	0.541687	5.04979	1.73383	0.0911759	0.245226	-5.14979
USP10	-0.406415	4.44026	-1.73223	0.091463	0.245315	-5.15237
CPSF4	0.379396	2.19137	1.73186	0.0915306	0.245315	-5.15297
ELAVL3	-1.09513	-2.83368	-1.72951	0.0919545	0.245991	-5.15676
RPF1	-0.19038	4.62112	-1.72867	0.0921053	0.245991	-5.1581
TRMT10C	-0.233318	4.27875	-1.72541	0.0926976	0.24714	-5.16336
SND1	-0.326593	8.48726	-1.72337	0.0930706	0.247645	-5.16664
NUFIP2	-0.461931	7.42967	-1.7226	0.0932121	0.247645	-5.16789
FIP1L1	-0.307086	5.70238	-1.72076	0.0935485	0.248107	-5.17084
WDR4	0.456042	2.1932	1.71902	0.0938688	0.248524	-5.17363
CIRBP	-0.348575	8.25992	-1.71648	0.0943363	0.249329	-5.1777
RPL3	-0.911383	7.75081	-1.71451	0.0947015	0.249861	-5.18086
R3HDM2	-0.386127	6.20274	-1.71252	0.0950711	0.250403	-5.18404
UBAP2L	-0.283899	6.225	-1.70756	0.0959977	0.252408	-5.19197
DDX4	1.07078	-2.42002	1.70066	0.0972987	0.255388	-5.20295
DHX36	-0.237094	5.96187	-1.69526	0.0983272	0.257414	-5.21152
TRMU	-0.392747	4.17349	-1.69484	0.0984081	0.257414	-5.21219
METTL2A	0.40723	2.53619	1.69266	0.0988258	0.25803	-5.21564
EIF5A	0.29905	4.82876	1.69184	0.0989821	0.25803	-5.21693
MRPL52	0.738616	3.3832	1.68822	0.0996806	0.259408	-5.22266
RPL37	-0.501648	7.86909	-1.68733	0.0998532	0.259414	-5.22406
SMG1	-0.36655	7.53721	-1.68458	0.100387	0.260337	-5.2284
UBAP2	-0.31661	6.16345	-1.68375	0.10055	0.260337	-5.22972
CELF1	0.266436	5.76577	1.67338	0.102588	0.264887	-5.24602
RCL1	-0.314432	5.59533	-1.67304	0.102655	0.264887	-5.24655
RANBP2	-0.499948	7.81348	-1.6694	0.103379	0.266307	-5.25226
FASTKD1	0.491802	3.46769	1.66455	0.104349	0.268004	-5.25983
EIF2A	-0.548519	6.38149	-1.66435	0.10439	0.268004	-5.26014
CPSF7	-0.15047	5.88153	-1.66064	0.105137	0.269469	-5.26592
RPL41	-0.84915	3.48239	-1.65727	0.105821	0.270192	-5.27117
POP7	-0.574223	3.95038	-1.65643	0.105992	0.270192	-5.27248
SCAF11	-0.277739	7.59451	-1.65592	0.106095	0.270192	-5.27326
SNRPD3	0.224159	5.14642	1.65488	0.106307	0.270192	-5.27488
MSI2	-0.595047	5.04025	-1.65421	0.106444	0.270192	-5.27592
CCAR1	-0.380294	5.76241	-1.65403	0.106482	0.270192	-5.27621
IARS2	-0.337681	5.91643	-1.65226	0.106844	0.270659	-5.27895
SNRNP35	0.522058	3.66416	1.65103	0.107096	0.270848	-5.28086
POLR2L	0.993627	4.83927	1.64701	0.107923	0.272487	-5.28707
SAMD4A	0.252344	8.78351	1.63942	0.109502	0.276018	-5.2988
SRSF2	0.274375	6.50044	1.63594	0.110231	0.277398	-5.30416
LARP1B	-0.347342	4.95748	-1.6315	0.111168	0.279294	-5.31098
PRPF38B	-0.178682	5.59309	-1.62947	0.111599	0.279914	-5.31409
KARS	-0.286213	5.67811	-1.62768	0.111978	0.280406	-5.31682
MRPL36	0.643349	2.67878	1.62612	0.112312	0.280781	-5.31922
NCBP2	0.324123	4.6318	1.62397	0.112771	0.281466	-5.3225
DDX23	-0.347116	5.5844	-1.62014	0.113594	0.283058	-5.32835
EIF2AK3	-0.696497	5.46719	-1.61514	0.114677	0.285289	-5.33596
UTP20	0.451087	5.06968	1.61418	0.114885	0.285342	-5.33742
SNRPA	-0.525292	5.01234	-1.61152	0.115464	0.285824	-5.34145
SRRM2	-0.481071	9.21801	-1.6113	0.115513	0.285824	-5.34179
PNN	-0.274794	7.14485	-1.6105	0.115686	0.285824	-5.343
CPSF6	-0.150758	6.63614	-1.60959	0.115886	0.285824	-5.34438
APOBEC1	0.60586	-4.15401	1.609	0.116016	0.285824	-5.34528
RNASE3	0.741723	-4.01301	1.60762	0.116319	0.286107	-5.34737
RPL14	-0.220237	6.79691	-1.60444	0.11702	0.287367	-5.35219
MAZ	0.23566	5.35039	1.59912	0.118198	0.289795	-5.36021
UPF1	-0.253254	6.46889	-1.59403	0.119336	0.292115	-5.36788
GTPBP10	0.2454	4.68574	1.59148	0.119909	0.292486	-5.37171
DDX3X	-0.463414	8.28516	-1.59119	0.119974	0.292486	-5.37214
NUDT16	-0.292516	5.25107	-1.5908	0.120063	0.292486	-5.37273
ZCCHC9	0.225948	3.83539	1.58851	0.120579	0.293274	-5.37616
AAR2	0.164788	4.33124	1.58164	0.122143	0.296604	-5.38644
NOL11	0.27171	4.32401	1.57782	0.123019	0.298035	-5.39214
ATXN2L	-0.413639	5.57219	-1.57713	0.123178	0.298035	-5.39317
IMP3	-0.470891	5.45921	-1.57652	0.123318	0.298035	-5.39408
IPO5	-0.348661	7.0863	-1.57438	0.123812	0.298755	-5.39726
TST	0.522346	2.31926	1.57193	0.124379	0.299495	-5.4009
ZFC3H1	-0.359937	6.63217	-1.57136	0.124511	0.299495	-5.40175
RBM10	-0.298632	5.20534	-1.57041	0.124732	0.299554	-5.40316
MRPS18B	-0.195158	4.74315	-1.56728	0.125462	0.300832	-5.4078
RPL11	-0.358066	9.12485	-1.56476	0.126052	0.30138	-5.41153
ISG20	-0.459868	3.41215	-1.5645	0.126112	0.30138	-5.41191
SNRPA1	-0.594781	4.44634	-1.56377	0.126283	0.30138	-5.41298
EEF2	-0.212894	10.6709	-1.55911	0.127382	0.303528	-5.41987
EMG1	-0.322189	4.64216	-1.5576	0.12774	0.303907	-5.4221
CDK9	-0.601065	3.63895	-1.55582	0.128162	0.304435	-5.42471
KPNB1	-0.284862	6.64824	-1.55309	0.128813	0.304993	-5.42873
RPP14	-0.288066	4.07737	-1.55234	0.128992	0.304993	-5.42983
SMG8	0.263156	3.39682	1.55226	0.12901	0.304993	-5.42995
TRMT1	-0.343372	3.53686	-1.55069	0.129388	0.304993	-5.43226
TOP3B	0.514963	2.14924	1.55065	0.129397	0.304993	-5.43232
NR0B1	-0.314938	-4.49841	-1.54489	0.130783	0.307784	-5.44075
HNRNPUL2	0.414017	5.12176	1.54227	0.131416	0.308797	-5.44458
TRMT1L	-0.258148	5.02542	-1.54126	0.131663	0.308901	-5.44606
CWC25	-0.202417	4.47623	-1.53192	0.133947	0.313778	-5.45965
OASL	1.07812	-2.8225	1.53032	0.134343	0.314221	-5.46198
TYW5	0.143944	4.03721	1.52697	0.135173	0.315679	-5.46684
SCAF1	-0.416974	4.24307	-1.52598	0.135418	0.315767	-5.46827
QKI	-0.202525	7.09896	-1.52374	0.135975	0.316582	-5.4715
SNRNP25	0.254441	2.69841	1.52237	0.136316	0.316894	-5.47348
ANG	-0.440214	4.3743	-1.51674	0.13773	0.319693	-5.4816
ZNFX1	-0.257591	6.57499	-1.51367	0.138504	0.319778	-5.48601
SRSF9	-0.792533	3.72611	-1.51296	0.138685	0.319778	-5.48704
FARSA	-0.424944	3.88294	-1.51285	0.138712	0.319778	-5.48719
CLK2	0.263008	4.84051	1.51208	0.138907	0.319778	-5.48829
TFB1M	-0.247281	3.30466	-1.5113	0.139106	0.319778	-5.48942
FYTTD1	-0.254914	6.29365	-1.51121	0.139129	0.319778	-5.48955
FXR1	-0.261385	6.65149	-1.50955	0.13955	0.319778	-5.49193
DDX55	-0.20729	4.3121	-1.50918	0.139644	0.319778	-5.49245
RPL6	-0.386093	6.37669	-1.50892	0.139711	0.319778	-5.49283
NELFE	-0.1627	4.74603	-1.50832	0.139864	0.319778	-5.49369
CPEB1	1.02041	-1.33792	1.5055	0.140585	0.320947	-5.49773
EIF2B1	0.266011	5.3702	1.50168	0.141565	0.322052	-5.50318
PABPC3	-0.518456	2.66498	-1.50124	0.141679	0.322052	-5.50381
THG1L	0.32911	2.36422	1.50115	0.141703	0.322052	-5.50394
THOC1	-0.283946	5.87416	-1.49755	0.142633	0.323685	-5.50907
TDRD1	0.86135	-1.53922	1.49575	0.143101	0.324262	-5.51163
RNASE6	1.03039	-3.20797	1.49338	0.143717	0.325176	-5.515
DDX59	-0.214697	4.49068	-1.4903	0.144522	0.325957	-5.51937
MRPL17	-0.23958	4.69442	-1.4897	0.144678	0.325957	-5.52021
KHNYN	-0.140139	6.33272	-1.4896	0.144704	0.325957	-5.52035
FAM120B	-0.456064	6.47901	-1.48433	0.146092	0.328598	-5.52781
DDX6	-0.412509	7.58862	-1.48278	0.146499	0.32903	-5.52999
RPS7	-0.325669	5.944	-1.47823	0.147709	0.330774	-5.53641
YTHDC2	-0.410491	5.41074	-1.47783	0.147816	0.330774	-5.53697
DDX58	-0.416329	4.49786	-1.47741	0.147926	0.330774	-5.53755
PCBP1	-0.204999	6.67753	-1.47597	0.148311	0.331148	-5.53958
PABPC1L2B	0.475111	-4.25729	1.47435	0.148745	0.331632	-5.54186
UTP14C	0.265445	5.37623	1.473	0.149107	0.331954	-5.54375
CNOT6L	-0.30716	5.75456	-1.46905	0.150169	0.333831	-5.54928
TSN	0.253179	5.6193	1.46612	0.150963	0.335107	-5.55338
U2AF2	-0.500925	5.33664	-1.46458	0.151382	0.335549	-5.55554
TDRD6	-0.452528	3.07834	-1.46239	0.151976	0.336376	-5.55858
CNOT3	-0.479134	4.08796	-1.45825	0.15311	0.338394	-5.56435
SKIV2L2	-0.200407	6.18026	-1.45447	0.154146	0.33982	-5.56959
PRPF4B	-0.115891	6.96122	-1.45428	0.1542	0.33982	-5.56986
PTRHD1	0.396543	2.07431	1.45133	0.155015	0.340739	-5.57395
EIF2S2	-0.243832	5.66928	-1.45085	0.155149	0.340739	-5.57461
RP9	-0.476814	1.7546	-1.45034	0.155288	0.340739	-5.57531
RRP8	-0.207099	3.34508	-1.44623	0.156431	0.342449	-5.58099
SMAD5	-0.193976	6.81372	-1.44593	0.156516	0.342449	-5.58141
TIAL1	-0.205809	6.25872	-1.4418	0.157671	0.344481	-5.5871
SLBP	-0.310443	4.87654	-1.44041	0.158061	0.344841	-5.58901
EIF4A2	-0.476597	7.38136	-1.43801	0.158737	0.345084	-5.59231
FRG1	0.172887	4.12172	1.4377	0.158823	0.345084	-5.59273
USP39	0.145247	4.37979	1.4376	0.158852	0.345084	-5.59287
XRCC6	-0.324468	6.3602	-1.43521	0.159527	0.346058	-5.59614
PUSL1	0.353534	2.40582	1.43359	0.159986	0.346562	-5.59836
IGF2BP1	1.16703	-2.15043	1.43237	0.160332	0.346818	-5.60003
CNOT4	-0.156666	5.41081	-1.43063	0.160829	0.347401	-5.60242
NSUN4	-0.31514	4.43214	-1.428	0.16158	0.348507	-5.60601
POLR2E	0.297944	4.5602	1.42723	0.161799	0.348507	-5.60705
SKIV2L	-0.195527	5.25145	-1.41724	0.164679	0.35421	-5.62063
RPS4Y1	-2.29532	3.2174	-1.41482	0.165382	0.354955	-5.6239
SF3B3	-0.320307	6.16911	-1.41445	0.165491	0.354955	-5.62441
PAPD4	-0.157924	6.06994	-1.40818	0.167326	0.358387	-5.63287
XRN1	-0.448772	6.86691	-1.40348	0.168711	0.360847	-5.63919
INTS7	0.464801	3.19038	1.40068	0.169541	0.362114	-5.64295
HNRNPH3	-0.357219	6.76748	-1.39879	0.170105	0.362811	-5.64549
MAEL	0.90502	-3.16059	1.39766	0.170439	0.363017	-5.64699
C1QBP	0.300284	4.08374	1.39573	0.171018	0.363741	-5.64958
SFSWAP	-0.244474	5.70674	-1.39404	0.171523	0.364307	-5.65184
HRSP12	0.387745	2.72331	1.38833	0.173241	0.367444	-5.65945
FUS	-0.307557	6.15935	-1.38447	0.174408	0.369386	-5.66457
FASTKD3	0.309153	2.61891	1.38309	0.17483	0.369386	-5.66641
PAN2	-0.138688	6.13279	-1.38291	0.174883	0.369386	-5.66664
SRSF1	-0.294004	7.35124	-1.37768	0.176479	0.372242	-5.67356
SNUPN	0.188661	3.91358	1.37647	0.176851	0.372463	-5.67516
MRPS14	0.126963	4.39012	1.37575	0.177073	0.372463	-5.67611
EIF1AY	-1.84039	1.06112	-1.37488	0.17734	0.372512	-5.67726
UTP15	-0.31252	3.49534	-1.36914	0.179112	0.375354	-5.68481
DDX18	-0.321825	5.58847	-1.36875	0.179233	0.375354	-5.68533
MRPS17	0.35162	2.19267	1.36811	0.179431	0.375354	-5.68617
MTG1	0.188751	3.12006	1.36619	0.180029	0.376088	-5.68869
KHDC1	0.348223	1.71806	1.36287	0.181062	0.37727	-5.69302
DDX21	-0.45091	6.15923	-1.36279	0.18109	0.37727	-5.69314
EIF2B3	0.16297	4.17878	1.35832	0.182488	0.379664	-5.69897
RPS26	-0.597838	0.19535	-1.35693	0.182928	0.380062	-5.70079
TRDMT1	0.411562	3.66964	1.35531	0.183438	0.380603	-5.7029
INTS3	-0.419425	5.9412	-1.35195	0.184501	0.381576	-5.70727
CPSF3L	-0.384557	5.27351	-1.35117	0.184749	0.381576	-5.70828
DALRD3	-0.846666	2.05529	-1.35068	0.184903	0.381576	-5.70891
HNRNPR	0.186196	7.20191	1.35067	0.184908	0.381576	-5.70893
ZC3H11A	0.133575	7.42986	1.34897	0.185447	0.381646	-5.71113
GCFC2	0.286764	4.61034	1.34844	0.185616	0.381646	-5.71181
ZCCHC24	0.277127	5.82969	1.3482	0.185693	0.381646	-5.71213
UBA1	0.198506	7.2029	1.34601	0.186392	0.382569	-5.71497
ARHGEF28	-0.253269	4.2282	-1.34512	0.186677	0.382637	-5.71611
WDR5	-0.168868	4.33508	-1.33301	0.190582	0.390117	-5.7317
PQBP1	-0.316683	4.49618	-1.33114	0.191192	0.390841	-5.7341
METTL2B	-0.429869	3.01775	-1.32983	0.191617	0.39089	-5.73577
SRSF8	-0.179518	6.01375	-1.32949	0.191728	0.39089	-5.73621
ZC3H10	0.3001	2.34507	1.326	0.192872	0.392057	-5.74067
SNRPD1	0.532448	4.76663	1.32587	0.192913	0.392057	-5.74083
RPL26L1	0.342211	2.33734	1.32428	0.193435	0.392057	-5.74286
EXOSC4	0.518836	2.02728	1.32425	0.193446	0.392057	-5.7429
MRPL48	0.296471	3.37098	1.32382	0.193586	0.392057	-5.74344
RBM47	0.972784	-1.36599	1.32188	0.194226	0.39283	-5.74592
RDM1	0.551431	-4.06566	1.31844	0.195363	0.394116	-5.75029
EIF3B	-0.238498	6.32207	-1.31827	0.195419	0.394116	-5.7505
NUDT16L1	0.306371	3.06031	1.31762	0.195636	0.394116	-5.75134
QTRTD1	0.337275	3.22031	1.31591	0.196203	0.394735	-5.7535
STAU1	-0.166962	6.35567	-1.31355	0.196989	0.395796	-5.75649
MAGOH	0.360717	3.46872	1.30796	0.19886	0.39866	-5.76355
RBM33	-0.216336	6.89629	-1.30729	0.199085	0.39866	-5.76439
U2SURP	-0.169336	7.12369	-1.30695	0.199199	0.39866	-5.76482
MOV10L1	0.812524	-3.17737	1.30534	0.19974	0.399218	-5.76684
RNASEK	-0.646693	1.06121	-1.3039	0.200225	0.399277	-5.76865
STRBP	0.262818	2.93937	1.3037	0.200293	0.399277	-5.7689
ADAT3	0.772767	-1.80063	1.30114	0.201159	0.400364	-5.77212
SF3B2	-0.12987	6.98922	-1.30054	0.201363	0.400364	-5.77287
RPL8	-0.412704	9.19752	-1.29814	0.202178	0.401099	-5.77588
ILF2	0.147551	5.97562	1.2979	0.202259	0.401099	-5.77618
ALKBH1	-0.423338	2.44546	-1.29708	0.202539	0.401133	-5.77721
MRPL27	0.391393	3.65121	1.29598	0.202914	0.401354	-5.77858
RIOK1	0.151052	4.05293	1.2933	0.203828	0.402639	-5.78192
SRRM4	0.976986	-2.46271	1.28107	0.208048	0.410443	-5.79712
DHX32	-0.454375	3.79923	-1.27958	0.208564	0.410931	-5.79896
RNASET2	0.407557	4.23915	1.27858	0.208912	0.411086	-5.80019
SRRT	0.334119	6.09182	1.27694	0.209486	0.411683	-5.80222
MRPS2	-0.392418	3.34574	-1.27457	0.210313	0.412777	-5.80513
POLR2F	0.49007	4.24856	1.27347	0.2107	0.413004	-5.80649
RNF113B	-0.515367	0.0445235	-1.26842	0.212477	0.415953	-5.81269
RPL7	-0.555971	3.06685	-1.26712	0.212937	0.41632	-5.81428
ATXN1	-0.136802	6.65371	-1.26564	0.213459	0.416806	-5.81609
STAU2	0.244281	4.0343	1.26463	0.213818	0.416972	-5.81732
RBM6	-0.235921	6.54958	-1.25591	0.216927	0.422496	-5.82794
CD2BP2	0.0951992	5.09965	1.25393	0.217639	0.423342	-5.83035
PARK7	0.267128	6.65555	1.25048	0.218883	0.425218	-5.83453
ZMAT2	0.114806	5.30375	1.24785	0.219831	0.425981	-5.8377
KIAA0391	0.216842	4.18417	1.24667	0.220262	0.425981	-5.83913
CELF3	0.562174	0.0564458	1.24581	0.220571	0.425981	-5.84016
PUS3	0.208913	2.5741	1.24518	0.220802	0.425981	-5.84093
POLR2J	0.596597	4.00563	1.24484	0.220926	0.425981	-5.84134
NSA2	-0.194435	5.31874	-1.24477	0.220951	0.425981	-5.84142
EEF1A1	-0.154421	9.49364	-1.24129	0.222217	0.427881	-5.8456
MTFMT	0.287328	4.07984	1.23834	0.223299	0.429421	-5.84915
FBXO17	-0.279427	4.98618	-1.23737	0.223652	0.429558	-5.8503
GAPDH	-0.349219	10.6169	-1.23513	0.224474	0.430595	-5.85298
RPL39L	0.311437	1.93328	1.23201	0.225627	0.432018	-5.85672
INTS8	-0.263136	5.1363	-1.23158	0.225783	0.432018	-5.85722
ANKHD1	-0.423604	4.47151	-1.2283	0.226997	0.433797	-5.86113
RPS11	-0.390837	9.32282	-1.22564	0.227985	0.435025	-5.86429
FASTK	0.250428	4.22423	1.22391	0.228631	0.435025	-5.86635
TTF2	-0.249466	3.91836	-1.22331	0.228854	0.435025	-5.86706
NOA1	-0.227977	3.84956	-1.22316	0.228911	0.435025	-5.86724
SF3A2	-0.422716	4.34978	-1.22275	0.229066	0.435025	-5.86773
GNL3	-0.335697	6.05571	-1.22149	0.229536	0.435375	-5.86922
PCBP2	-0.26267	7.69321	-1.22048	0.229911	0.435546	-5.8704
RPP25	-0.384058	2.29526	-1.21846	0.230669	0.436439	-5.87279
ADAR	-0.282116	7.10748	-1.21463	0.232111	0.437954	-5.87732
DDX60L	0.424873	3.08083	1.21445	0.232181	0.437954	-5.87753
PPIH	0.293634	3.144	1.21405	0.232331	0.437954	-5.878
LSM5	0.161894	4.37589	1.20935	0.234108	0.440759	-5.88352
BOP1	0.668569	-1.24036	1.20679	0.235081	0.442046	-5.88652
PPIL4	-0.328975	5.2964	-1.20586	0.235434	0.442078	-5.8876
EIF2B4	0.233922	4.65491	1.20522	0.235678	0.442078	-5.88835
CDC40	-0.179543	4.3483	-1.20436	0.236009	0.442154	-5.88936
AARSD1	-0.724127	-3.2252	-1.20149	0.237104	0.443637	-5.89271
CSTF2T	0.12516	5.16668	1.20077	0.237382	0.443637	-5.89355
RPS27L	0.539635	6.17482	1.19983	0.23774	0.443761	-5.89464
PIH1D3	0.756298	-3.37508	1.19696	0.238844	0.445278	-5.89798
MRPL34	0.502799	4.39311	1.19566	0.239345	0.445666	-5.89949
EIF4ENIF1	-0.193622	4.55582	-1.19311	0.240332	0.446629	-5.90245
MRPL38	-0.336384	4.2465	-1.19242	0.240598	0.446629	-5.90324
LARP1	-0.154149	7.20731	-1.19205	0.240741	0.446629	-5.90367
SYMPK	-0.301739	4.69846	-1.19023	0.241445	0.447166	-5.90577
TDRD9	0.350456	2.71598	1.1894	0.241769	0.447166	-5.90674
RBFOX1	0.859361	-2.85346	1.18841	0.242156	0.447166	-5.90788
INTS1	-0.375626	5.11477	-1.18828	0.242203	0.447166	-5.90802
KHSRP	0.322949	5.73324	1.18676	0.242798	0.447723	-5.90979
PSTK	0.307517	1.5463	1.18559	0.243252	0.448019	-5.91113
SECISBP2	-0.41499	5.08943	-1.18145	0.244874	0.449851	-5.91589
CDK5RAP1	-0.245062	3.00178	-1.18119	0.244973	0.449851	-5.91618
RNASE4	-0.256407	6.46092	-1.18079	0.245132	0.449851	-5.91665
STRAP	0.19953	6.27825	1.17291	0.248238	0.454804	-5.92565
TPR	-0.294221	7.83781	-1.17227	0.248493	0.454804	-5.92639
NMD3	-0.31361	5.60563	-1.17168	0.248726	0.454804	-5.92706
SUZ12	-0.166469	5.26024	-1.17078	0.249082	0.454911	-5.92808
NOP16	-0.222599	2.29406	-1.16905	0.249771	0.455371	-5.93005
ELAVL1	0.165676	5.53243	1.16865	0.249931	0.455371	-5.93051
RPUSD3	0.345939	3.34805	1.16587	0.251038	0.456842	-5.93366
WDR61	0.343976	5.64353	1.16065	0.253128	0.460096	-5.93956
RNASE11	0.565191	-4.0171	1.15897	0.253807	0.460492	-5.94147
GEMIN7	0.338943	2.04118	1.15861	0.25395	0.460492	-5.94187
NOC3L	0.23945	4.39677	1.15514	0.255352	0.462076	-5.94578
DYNLL1	0.338726	5.84241	1.15494	0.25543	0.462076	-5.94599
CPSF2	0.384504	5.03511	1.15022	0.257346	0.464926	-5.95129
WIBG	-0.205314	3.03404	-1.14956	0.257615	0.464926	-5.95203
WARS2	0.161413	3.90263	1.14706	0.258635	0.466215	-5.95483
EXOSC2	-0.113968	4.33689	-1.14534	0.259337	0.46693	-5.95675
RNASE2	0.665803	-3.51084	1.14391	0.259919	0.467425	-5.95833
RBM12B	-0.412454	5.43567	-1.13551	0.263378	0.473088	-5.96766
ENDOG	-0.54477	0.377628	-1.13316	0.264352	0.474278	-5.97026
LSM3	0.460228	4.48786	1.12643	0.267149	0.478703	-5.97767
POLRMT	-0.278307	3.8174	-1.1253	0.267623	0.478703	-5.97891
TARDBP	-0.170205	5.87561	-1.12497	0.26776	0.478703	-5.97927
DYNC1H1	-0.402482	7.95957	-1.12145	0.269236	0.480779	-5.98312
MTHFSD	0.188952	3.45817	1.11937	0.270111	0.481777	-5.9854
MRPL14	0.214556	2.50196	1.11273	0.272915	0.48524	-5.99262
TSEN54	-0.246564	2.15357	-1.11249	0.273019	0.48524	-5.99289
DRG1	-0.145849	5.10061	-1.11205	0.273203	0.48524	-5.99336
PRPF40B	-0.261624	3.4849	-1.11177	0.273325	0.48524	-5.99367
G3BP1	0.239129	6.24314	1.10781	0.275008	0.487659	-5.99795
ZNF768	-0.325563	4.45248	-1.10051	0.278135	0.492204	-6.00582
IPO4	-0.199279	3.8653	-1.10032	0.278216	0.492204	-6.00603
FTSJ1	0.239823	4.43348	1.09815	0.27915	0.493283	-6.00835
ADAD1	0.566492	-3.84951	1.09633	0.279933	0.494095	-6.0103
EXOSC9	-0.124145	3.48288	-1.09551	0.280289	0.494151	-6.01118
RPS3	-0.241508	8.79803	-1.09181	0.281891	0.496401	-6.01513
CHERP	-0.312486	4.46682	-1.09035	0.282527	0.496948	-6.01669
TEX13A	0.494016	-4.11628	1.08802	0.283539	0.498154	-6.01917
MRPL4	0.300685	2.82149	1.08446	0.285092	0.500305	-6.02294
C9orf129	-0.69057	0.543925	-1.07776	0.288036	0.504891	-6.03003
PUS10	-0.650245	2.91173	-1.07684	0.288442	0.505023	-6.031
EIF5	-0.232562	8.05153	-1.07421	0.289601	0.50647	-6.03376
SMG7	-0.243293	5.52855	-1.07295	0.290161	0.506868	-6.03508
PSMA1	0.190568	5.80427	1.07197	0.290593	0.507042	-6.03611
ICT1	0.367635	3.4102	1.07032	0.291328	0.507742	-6.03784
TFAM	-0.217717	4.86637	-1.06669	0.292939	0.509968	-6.04163
SNRPF	0.437762	3.29375	1.06567	0.293398	0.509973	-6.0427
DNAJC21	0.0930806	5.58665	1.06519	0.293611	0.509973	-6.0432
SF3B14	0.296114	5.11061	1.06114	0.295423	0.51132	-6.04741
AGO3	-0.34387	5.04678	-1.06053	0.295697	0.51132	-6.04804
TCOF1	0.239328	4.66069	1.06049	0.295714	0.51132	-6.04808
GTPBP4	-0.142677	4.97542	-1.05977	0.296037	0.51132	-6.04883
CSTF3	0.17893	4.83489	1.05969	0.296071	0.51132	-6.04891
TDRD7	0.337156	3.0216	1.05897	0.296398	0.51132	-6.04966
IARS	-0.432047	6.69614	-1.05781	0.296919	0.511605	-6.05086
GFM2	0.102744	4.39177	1.05711	0.297234	0.511605	-6.05158
MRPL55	-0.463426	4.05806	-1.05498	0.298193	0.512331	-6.05378
NPM2	-0.525686	-2.19472	-1.05407	0.298604	0.512331	-6.05472
RBM15B	0.222564	4.81579	1.05394	0.298664	0.512331	-6.05486
TRMT2B	0.222986	3.29714	1.05318	0.299006	0.512341	-6.05564
THUMPD1	0.129527	5.75146	1.05186	0.299605	0.512792	-6.057
TRUB2	0.148982	3.39408	1.05071	0.300126	0.513108	-6.05819
ZCCHC17	-0.244699	5.14672	-1.04957	0.300642	0.513414	-6.05935
NHP2	0.31905	4.45133	1.04369	0.30332	0.517409	-6.06538
LUZP4	0.398614	-4.24929	1.04186	0.304155	0.517901	-6.06725
TROVE2	-0.350316	5.28966	-1.04153	0.304309	0.517901	-6.06759
SNRPC	0.214007	3.52684	1.04083	0.304628	0.517901	-6.0683
PUS7	0.134138	4.38182	1.03991	0.305049	0.51804	-6.06924
NUDT21	-0.142483	6.65037	-1.0365	0.306616	0.520121	-6.07271
INTS10	-0.157295	5.82772	-1.03309	0.308188	0.522041	-6.07617
YARS2	0.266959	2.81731	1.03256	0.308432	0.522041	-6.0767
PPWD1	-0.229203	5.48586	-1.02852	0.310301	0.524623	-6.08078
RPS9	-0.207615	7.92495	-1.02509	0.311898	0.526738	-6.08423
DDX41	-0.245178	4.91293	-1.02378	0.312507	0.527183	-6.08555
DDX5	-0.147451	9.5769	-1.02113	0.313744	0.528226	-6.0882
RPL4	-0.161221	9.42256	-1.02097	0.313818	0.528226	-6.08836
NARS2	-0.319443	3.4	-1.01981	0.314361	0.528556	-6.08952
TRIM25	-0.26241	4.12602	-1.01704	0.315661	0.529937	-6.09229
AQR	-0.294344	5.50894	-1.01658	0.315877	0.529937	-6.09275
EIF2S1	-0.253329	5.60811	-1.00753	0.320149	0.536513	-6.10174
CSDE1	-0.200638	8.82078	-1.0055	0.321109	0.537532	-6.10374
NOL12	0.247072	3.10286	0.99938	0.324025	0.541818	-6.10976
NCL	-0.216451	8.79299	-0.997071	0.325129	0.542318	-6.11203
ZMAT5	-0.477001	0.662463	-0.997052	0.325139	0.542318	-6.11204
KRR1	-0.337618	4.51741	-0.995901	0.32569	0.542318	-6.11317
C2orf15	0.59442	-1.70994	0.995784	0.325746	0.542318	-6.11328
TRIM21	0.292241	2.20758	0.994577	0.326326	0.54269	-6.11446
SUGP1	0.259907	3.716	0.992641	0.327256	0.543073	-6.11635
MKRN2	-0.172983	5.36379	-0.99155	0.327781	0.543073	-6.11742
SLTM	0.137559	6.53079	0.99123	0.327935	0.543073	-6.11773
MRPL28	0.223185	3.1561	0.991136	0.327981	0.543073	-6.11782
FBLL1	0.507785	-3.55665	0.983107	0.331864	0.548907	-6.1256
GFM1	0.361466	4.46517	0.977135	0.334773	0.553087	-6.13136
IPO9	0.153459	5.6712	0.976432	0.335116	0.553087	-6.13203
LSM10	0.436945	3.79955	0.968687	0.338916	0.558754	-6.13944
SLIRP	0.41895	4.15167	0.966123	0.340181	0.560233	-6.14187
INTS5	-0.126619	3.20993	-0.960954	0.34274	0.563838	-6.14677
ZNF346	-0.115933	3.59659	-0.959752	0.343336	0.564211	-6.14791
MRPL40	0.289289	4.54139	0.955706	0.34535	0.566909	-6.15172
URM1	0.175783	4.31299	0.953283	0.34656	0.567536	-6.154
DCP2	-0.396248	5.6332	-0.952254	0.347074	0.567536	-6.15496
FAM98B	0.43065	2.10278	0.952239	0.347082	0.567536	-6.15498
AKAP17A	0.152752	-4.56719	0.951938	0.347233	0.567536	-6.15526
DIMT1	-0.170925	3.85283	-0.95074	0.347833	0.567536	-6.15638
TYW3	0.183692	4.88773	0.950476	0.347965	0.567536	-6.15663
SRP19	0.160913	4.94082	0.94775	0.349333	0.568408	-6.15917
RARS2	0.116516	5.77037	0.947031	0.349694	0.568408	-6.15984
RPL23	-0.256222	8.39788	-0.946445	0.349989	0.568408	-6.16039
SSU72	0.117514	5.10768	0.946443	0.34999	0.568408	-6.16039
MRPS27	-0.0973572	5.67047	-0.943655	0.351395	0.570082	-6.16298
APOBEC4	0.583675	-1.72698	0.94061	0.352933	0.571638	-6.16581
DDX49	0.104064	3.43475	0.940208	0.353136	0.571638	-6.16618
REXO1	-0.321811	2.82297	-0.939533	0.353478	0.571638	-6.16681
LSM6	0.275621	2.95882	0.929829	0.358415	0.579007	-6.17574
RPS3A	-0.190751	6.86857	-0.926731	0.360001	0.579351	-6.17857
MRPL33	0.180773	4.49003	0.926356	0.360193	0.579351	-6.17891
PHAX	0.112403	5.12503	0.925541	0.360611	0.579351	-6.17966
RBMS2	-0.145259	5.81978	-0.925192	0.36079	0.579351	-6.17998
RPL35	-0.283425	7.66926	-0.925082	0.360846	0.579351	-6.18008
RPP25L	-0.183782	2.14356	-0.924964	0.360907	0.579351	-6.18018
DUS3L	-0.192079	2.42793	-0.920915	0.36299	0.582081	-6.18387
RBM44	-0.417306	1.43368	-0.918144	0.364419	0.58376	-6.18638
LRRFIP2	-0.163151	6.83514	-0.91475	0.366175	0.585831	-6.18944
PUM2	-0.247757	6.84673	-0.914162	0.36648	0.585831	-6.18997
MRPL24	0.252743	4.14858	0.912959	0.367104	0.586214	-6.19106
RPL5	-0.26714	9.08158	-0.912051	0.367576	0.586353	-6.19188
RPL18	-0.274388	8.79873	-0.909881	0.368705	0.587376	-6.19383
SMAD4	-0.13326	6.6473	-0.908077	0.369645	0.587376	-6.19544
SNRPB2	0.15051	4.70815	0.907961	0.369705	0.587376	-6.19555
RBM26	-0.106401	6.1676	-0.90786	0.369758	0.587376	-6.19564
NSUN2	-0.335042	4.7513	-0.905122	0.371187	0.588701	-6.19808
SNRPE	0.142991	2.87894	0.904505	0.37151	0.588701	-6.19863
PTCD1	0.478353	-3.56261	0.904046	0.37175	0.588701	-6.19904
NUFIP1	-0.244953	2.32093	-0.901557	0.373055	0.590154	-6.20126
PTBP3	-0.26777	6.04401	-0.900115	0.373812	0.590189	-6.20254
PPP1R8	0.115064	4.94496	0.900039	0.373851	0.590189	-6.20261
SNRNP200	-0.124054	7.43567	-0.896391	0.37577	0.592347	-6.20584
CRYZ	0.258891	4.36831	0.895966	0.375995	0.592347	-6.20622
MRPL20	0.236399	5.04581	0.891463	0.378373	0.595479	-6.21019
BRCA1	0.20262	3.1132	0.88628	0.381123	0.599188	-6.21474
TBRG4	-0.0808811	4.29952	-0.88447	0.382086	0.600084	-6.21632
PARN	0.121635	5.06515	0.881488	0.383677	0.601962	-6.21892
MRPL51	0.24747	5.37416	0.878746	0.385143	0.602735	-6.2213
APEX1	0.164884	5.37191	0.878554	0.385246	0.602735	-6.22147
NANOS1	0.186119	3.19915	0.87791	0.38559	0.602735	-6.22203
MRPL53	0.406562	4.18046	0.877612	0.38575	0.602735	-6.22229
CAPRIN2	0.126767	5.63207	0.875626	0.386815	0.60378	-6.22401
KIAA0020	0.132194	4.80981	0.87315	0.388146	0.605238	-6.22614
PAIP1	-0.113267	3.63826	-0.871076	0.389263	0.606359	-6.22793
PIWIL1	0.588139	-3.34889	0.869857	0.38992	0.606764	-6.22898
RPS5	-0.354082	8.16889	-0.867839	0.39101	0.607839	-6.23071
UTP23	-0.224531	4.3437	-0.864577	0.392776	0.609962	-6.2335
EIF3A	-0.151212	7.95148	-0.862788	0.393746	0.6106	-6.23503
WDR43	0.155521	4.84097	0.862344	0.393987	0.6106	-6.23541
LENG9	-0.28234	3.25533	-0.859954	0.395287	0.611992	-6.23744
PIWIL3	0.571407	-3.45161	0.858198	0.396243	0.612306	-6.23894
RPSA	-0.194285	5.42396	-0.858108	0.396292	0.612306	-6.23901
TRIM71	-0.471137	-3.63879	-0.856733	0.397042	0.612843	-6.24018
SNRNP48	-0.102107	4.62924	-0.855328	0.397809	0.613406	-6.24137
MSI1	-0.309839	-0.236055	-0.854378	0.398328	0.613586	-6.24217
BICC1	-0.40213	4.06087	-0.8523	0.399466	0.614718	-6.24392
TNRC6B	-0.174771	7.52118	-0.850325	0.400548	0.61548	-6.24558
TRMT61B	0.293949	2.25056	0.849925	0.400768	0.61548	-6.24592
CSTF1	-0.075746	4.10394	-0.848924	0.401318	0.615704	-6.24676
VARS2	0.139334	3.75809	0.841237	0.405555	0.621515	-6.25319
RSRC1	-0.222814	4.07137	-0.840311	0.406067	0.621515	-6.25396
RPL13A	-0.170205	7.22748	-0.83984	0.406328	0.621515	-6.25435
EPRS	-0.202045	7.06244	-0.837862	0.407424	0.622567	-6.25599
WDR36	-0.102976	5.80294	-0.837058	0.40787	0.622625	-6.25666
NHP2L1	0.220028	5.70002	0.827477	0.413209	0.630144	-6.26455
RALY	-0.153608	4.89673	-0.826274	0.413882	0.63054	-6.26553
PDCD7	-0.31019	3.77869	-0.823484	0.415447	0.631399	-6.26781
SRFBP1	0.289779	3.82391	0.82271	0.415881	0.631399	-6.26844
RNASE9	0.419986	-3.97762	0.822556	0.415968	0.631399	-6.26857
ZC3HAV1	0.188086	5.79372	0.821825	0.416378	0.631399	-6.26916
SECISBP2L	-0.178876	7.44619	-0.82158	0.416516	0.631399	-6.26936
DDX43	0.356292	2.30298	0.818766	0.4181	0.63317	-6.27165
DCPS	0.215556	2.09578	0.815798	0.419775	0.635076	-6.27405
ZC3H12B	0.09329	3.16237	0.813605	0.421014	0.63632	-6.27582
RBM18	-0.128587	4.31783	-0.811786	0.422045	0.637189	-6.27728
GRWD1	-0.147257	3.17874	-0.811115	0.422425	0.637189	-6.27782
EFTUD2	-0.0780442	4.90969	-0.809147	0.423542	0.637614	-6.2794
NSUN7	0.353037	0.511768	0.809145	0.423543	0.637614	-6.2794
SNRPG	0.503214	3.15555	0.807324	0.424578	0.638542	-6.28086
ESF1	0.144925	5.06674	0.804534	0.426167	0.6403	-6.28309
TRMT5	0.0956307	5.08924	0.803472	0.426773	0.640579	-6.28394
TRNT1	0.178773	4.15018	0.802442	0.427361	0.640831	-6.28476
UHMK1	0.383394	5.36074	0.801237	0.428049	0.641233	-6.28571
CLK4	-0.119636	5.32871	-0.79805	0.429873	0.643334	-6.28824
SRA1	0.105548	4.28467	0.797279	0.430316	0.643364	-6.28885
LSM2	0.285651	3.7298	0.793176	0.432672	0.646254	-6.29208
MRPL22	0.31174	4.52554	0.791893	0.433411	0.646724	-6.29309
HNRNPCL1	-0.233271	-4.38583	-0.789462	0.434812	0.647982	-6.295
ABT1	-0.110668	3.59052	-0.787938	0.435692	0.647982	-6.29619
MRPL21	-0.263481	4.20672	-0.787601	0.435887	0.647982	-6.29645
RBMS1	-0.0872972	6.40129	-0.787486	0.435954	0.647982	-6.29654
DHX9	0.0980113	6.71137	0.78543	0.437143	0.64905	-6.29815
NSUN3	0.166561	2.63311	0.784773	0.437523	0.64905	-6.29866
TSR3	-0.397127	2.92683	-0.783627	0.438188	0.649404	-6.29955
DARS2	-0.179946	4.17939	-0.782081	0.439084	0.650101	-6.30075
SWT1	0.2168	4.98861	0.779302	0.440699	0.651834	-6.3029
THRAP3	-0.125368	7.38798	-0.778596	0.44111	0.651834	-6.30345
TRIM56	-0.147324	4.03491	-0.775591	0.442861	0.653788	-6.30576
DHX16	0.086307	4.60868	0.774681	0.443392	0.653939	-6.30646
RPL36	-0.364078	7.91284	-0.766873	0.447965	0.659421	-6.31243
RPL36AL	-0.333945	6.92008	-0.766858	0.447974	0.659421	-6.31245
CCRN4L	-0.367077	2.45096	-0.764315	0.449469	0.660984	-6.31438
RPS27A	-0.285643	8.88005	-0.762998	0.450244	0.661486	-6.31538
RPL35A	-0.233714	8.06227	-0.762142	0.450749	0.661591	-6.31602
LUC7L	0.171256	5.75056	0.759743	0.452165	0.66303	-6.31784
RNASEH2C	0.324981	5.47248	0.758222	0.453064	0.66371	-6.31898
EIF3J	0.103253	5.68169	0.752773	0.456293	0.667799	-6.32307
RNASE8	0.410687	-1.74249	0.750426	0.457687	0.669198	-6.32482
SRP68	-0.146061	5.70623	-0.749237	0.458395	0.669498	-6.32571
PABPC1L	-0.272522	3.71352	-0.748204	0.459011	0.669498	-6.32648
INTS9	-0.331623	2.54286	-0.74787	0.45921	0.669498	-6.32672
TRMT10B	0.0813607	4.65393	0.745422	0.46067	0.670986	-6.32854
CWC27	-0.131889	4.48247	-0.744077	0.461474	0.671373	-6.32953
RPL39	-0.298287	3.75442	-0.743491	0.461824	0.671373	-6.32997
UTP14A	0.12382	3.44271	0.742635	0.462336	0.671373	-6.3306
PURB	0.157156	5.89152	0.741125	0.46324	0.671373	-6.33171
APOBEC3F	-0.180417	2.12548	-0.7406	0.463555	0.671373	-6.3321
NOB1	-0.250867	4.69966	-0.740562	0.463577	0.671373	-6.33213
ELAVL2	-0.481925	-2.36673	-0.736294	0.46614	0.674443	-6.33526
PABPC1L2A	0.231822	-4.36664	0.733014	0.468114	0.676657	-6.33765
PCBP3	0.406283	0.572477	0.728406	0.470896	0.678958	-6.341
POLR2G	0.271526	4.75361	0.72807	0.471099	0.678958	-6.34124
RQCD1	-0.152011	4.93712	-0.72746	0.471468	0.678958	-6.34168
RBM19	-0.100334	4.84254	-0.726098	0.472293	0.678958	-6.34267
DGCR14	-0.169055	3.20452	-0.725774	0.472489	0.678958	-6.3429
CARS2	0.117006	4.9497	0.725722	0.472521	0.678958	-6.34294
WDR3	0.268412	3.89335	0.724967	0.472978	0.678958	-6.34348
RBM11	-0.441995	-3.35786	-0.724491	0.473267	0.678958	-6.34383
RANBP6	0.290813	4.31792	0.723485	0.473877	0.679027	-6.34455
RPS21	-0.365389	7.80265	-0.722944	0.474206	0.679027	-6.34494
FXR2	-0.0949283	4.48398	-0.716428	0.478171	0.684063	-6.3496
MRPS6	-0.313839	5.40618	-0.714676	0.479241	0.684311	-6.35085
ETF1	-0.176385	5.87044	-0.714488	0.479356	0.684311	-6.35098
ADARB2	0.479364	-0.0121742	0.71394	0.479691	0.684311	-6.35137
RPS19BP1	0.241328	4.88447	0.70498	0.485185	0.690312	-6.35769
FASTKD2	-0.150558	5.19766	-0.70405	0.485757	0.690312	-6.35835
NANOS3	0.403601	-1.45217	0.703366	0.486178	0.690312	-6.35883
CNOT10	0.138401	4.09045	0.703077	0.486356	0.690312	-6.35903
R3HDM1	0.166245	4.49704	0.702969	0.486423	0.690312	-6.3591
ZC3H4	0.143097	4.96377	0.702659	0.486613	0.690312	-6.35932
POLR2J2	-0.493399	-2.91894	-0.701067	0.487595	0.691061	-6.36043
AGO1	-0.0683441	5.84904	-0.695032	0.491326	0.695703	-6.36462
RPS13	-0.257797	7.9609	-0.692517	0.492885	0.696654	-6.36636
RBM23	-0.199928	5.89634	-0.692474	0.492912	0.696654	-6.36639
SEPSECS	-0.143443	4.36652	-0.691593	0.493459	0.696782	-6.367
CTU2	-0.306346	1.62381	-0.68648	0.496639	0.699687	-6.3705
RPL15	-0.188539	9.50167	-0.685902	0.497	0.699687	-6.3709
NSRP1	-0.167388	5.88354	-0.685577	0.497202	0.699687	-6.37112
EEF1D	-0.214672	8.25765	-0.68434	0.497974	0.699687	-6.37197
TARS2	-0.0879686	4.07268	-0.684161	0.498086	0.699687	-6.37209
EXOSC1	0.201698	3.96067	0.683867	0.498269	0.699687	-6.37229
SYNCRIP	0.103976	7.15244	0.682869	0.498893	0.699918	-6.37297
RPS8	-0.212404	9.52135	-0.678209	0.501809	0.703362	-6.37612
MRPS35	-0.172892	4.01328	-0.676483	0.502891	0.704232	-6.37729
TNPO1	-0.252268	6.4821	-0.673878	0.504528	0.704553	-6.37904
RPS28	-0.395525	3.41473	-0.67339	0.504835	0.704553	-6.37937
HDLBP	-0.0906975	9.60113	-0.673156	0.504981	0.704553	-6.37952
BUD13	0.256888	2.55462	0.672512	0.505387	0.704553	-6.37996
SLC4A1AP	0.0861415	4.895	0.672443	0.50543	0.704553	-6.38
RPL19	-0.216558	9.42604	-0.670859	0.506428	0.705299	-6.38106
GRSF1	-0.0818145	6.09618	-0.669765	0.507116	0.705614	-6.38179
WDR83	0.127874	3.16974	0.66794	0.508268	0.706571	-6.38301
JAKMIP1	0.418654	-3.21656	0.665431	0.509853	0.708129	-6.38468
TNPO3	-0.237465	4.88426	-0.66443	0.510486	0.708363	-6.38534
SRP9	-0.209779	5.21419	-0.662823	0.511504	0.70913	-6.3864
HBS1L	-0.250842	5.35843	-0.661627	0.512261	0.709223	-6.38719
EIF6	0.179819	5.08723	0.661249	0.512501	0.709223	-6.38744
ENDOV	-0.11549	2.71012	-0.66001	0.513286	0.709666	-6.38825
NOC2L	-0.189525	3.58857	-0.657519	0.514868	0.711209	-6.38989
RNF17	0.535166	-2.21329	0.654596	0.516729	0.713132	-6.3918
TSR1	-0.174859	4.3163	-0.650787	0.519158	0.715837	-6.39428
MRP63	0.151506	4.56133	0.646754	0.521736	0.718742	-6.39689
RNH1	0.211192	6.63297	0.641082	0.525374	0.7231	-6.40053
THOC7	0.205089	5.32002	0.639524	0.526375	0.723825	-6.40152
SIDT1	-0.336378	-0.0444394	-0.636276	0.528467	0.725729	-6.40359
LSM12	0.273547	1.21751	0.635478	0.528981	0.725729	-6.4041
ZCCHC6	-0.12031	6.3845	-0.635158	0.529188	0.725729	-6.4043
BMS1	-0.204792	5.46102	-0.633895	0.530002	0.726194	-6.4051
TRUB1	0.166017	3.79975	0.632089	0.531169	0.726336	-6.40624
API5	0.146283	5.28145	0.631831	0.531336	0.726336	-6.4064
MTERFD2	0.147266	5.87695	0.631136	0.531785	0.726336	-6.40684
PUF60	-0.123102	4.85039	-0.630787	0.532011	0.726336	-6.40706
ESRP1	0.414719	-3.02225	0.629445	0.532879	0.726465	-6.4079
TYW1	-0.0900895	4.48002	-0.629048	0.533137	0.726465	-6.40815
SSB	-0.117977	6.4701	-0.628433	0.533535	0.726465	-6.40854
SMAD6	-0.12991	4.77776	-0.623567	0.536692	0.730111	-6.41158
LARS2	0.31717	2.4688	0.621975	0.537727	0.730868	-6.41257
XPO4	0.162592	5.40851	0.619117	0.539588	0.732472	-6.41434
ISG20L2	-0.191434	3.2189	-0.618688	0.539868	0.732472	-6.4146
RBMXL1	0.10504	4.79659	0.617496	0.540644	0.732874	-6.41534
NKRF	-0.104791	3.32194	-0.614587	0.542544	0.734368	-6.41712
HARS	0.0746333	5.20655	0.614231	0.542777	0.734368	-6.41734
RPL34	-0.265803	8.70775	-0.613329	0.543367	0.734368	-6.4179
TRMT6	0.0844576	3.9425	0.612861	0.543673	0.734368	-6.41818
WRAP53	-0.235255	0.780346	-0.611663	0.544457	0.734485	-6.41891
ZC3HAV1L	-0.338046	3.1185	-0.610757	0.54505	0.734485	-6.41947
TNRC6A	0.0750609	7.61157	0.610521	0.545205	0.734485	-6.41961
DZIP1	0.0703911	6.11157	0.607731	0.547034	0.736279	-6.42131
BARD1	-0.24472	3.12601	-0.607018	0.547502	0.736279	-6.42174
CCNT2	0.0990291	5.70431	0.605249	0.548664	0.737192	-6.42281
UTP6	-0.0764896	5.13695	-0.604278	0.549303	0.7374	-6.4234
REXO2	0.206803	7.00926	0.602961	0.550169	0.737914	-6.42419
MRPS9	-0.0893608	3.93547	-0.595326	0.555206	0.744015	-6.42876
CNOT7	-0.199774	5.06103	-0.594122	0.556003	0.744429	-6.42947
URB1	0.152453	4.9583	0.592933	0.55679	0.744829	-6.43018
ZGPAT	0.11788	3.54508	0.588835	0.559507	0.746784	-6.4326
NOL10	-0.0913736	4.69435	-0.588019	0.560049	0.746784	-6.43308
RPL3L	-0.378759	-2.90563	-0.586501	0.561058	0.746784	-6.43397
RAVER1	-0.115467	3.66895	-0.585557	0.561686	0.746784	-6.43452
ZNF385A	0.35873	5.6854	0.585464	0.561748	0.746784	-6.43457
WARS	-0.0809351	4.80315	-0.584979	0.56207	0.746784	-6.43486
DHX34	-0.104741	3.31548	-0.584323	0.562507	0.746784	-6.43524
EIF5B	0.0891473	6.57849	0.584108	0.56265	0.746784	-6.43537
OBFC1	0.0458441	4.52608	0.584094	0.562659	0.746784	-6.43537
SRP14	0.201724	6.64224	0.581903	0.564119	0.747549	-6.43665
NOC4L	-0.163226	2.02914	-0.581405	0.564451	0.747549	-6.43694
FRG1B	-0.267696	3.02114	-0.580431	0.565101	0.747549	-6.43751
U2AF1L4	-0.300936	3.68439	-0.580288	0.565196	0.747549	-6.43759
TRMT12	0.112115	3.1681	0.57874	0.566229	0.747901	-6.43848
NOVA2	-0.294079	-3.75705	-0.57842	0.566443	0.747901	-6.43867
ZCCHC13	0.190451	-4.37265	0.577217	0.567247	0.748315	-6.43936
RPL38	-0.243955	7.92905	-0.571646	0.570977	0.752584	-6.44256
PRKDC	0.169903	7.85514	0.567998	0.573427	0.754657	-6.44464
RNASEH2A	-0.106561	1.68567	-0.56783	0.573539	0.754657	-6.44473
DNAAF2	0.11766	3.46349	0.563553	0.576418	0.757791	-6.44715
CELF6	-0.109109	2.55608	-0.557973	0.580184	0.760318	-6.45028
UPF3A	0.18585	4.16927	0.5578	0.580301	0.760318	-6.45038
RPL12	-0.199121	7.86165	-0.557782	0.580313	0.760318	-6.45039
RUVBL2	-0.109454	4.7136	-0.55775	0.580335	0.760318	-6.45041
TERT	0.345854	-3.3908	0.550971	0.584926	0.765676	-6.45416
RRP15	0.122371	4.50044	0.549398	0.585994	0.766183	-6.45503
MRPS10	0.0834513	3.64843	0.548921	0.586318	0.766183	-6.45529
EXOSC6	-0.162162	3.40213	-0.545821	0.588426	0.768279	-6.45699
PRPF31	-0.121075	5.34082	-0.544834	0.589098	0.768498	-6.45753
SERBP1	-0.0592738	8.01872	-0.543679	0.589884	0.768866	-6.45816
METTL5	0.098065	4.1845	0.542832	0.590462	0.768962	-6.45862
TSEN2	0.130165	3.4863	0.536247	0.594959	0.772211	-6.46217
RPL27A	-0.0964097	7.48289	-0.53587	0.595217	0.772211	-6.46237
KIAA0430	0.078042	6.43348	0.535562	0.595428	0.772211	-6.46254
RPLP0	0.103186	7.78231	0.535185	0.595686	0.772211	-6.46274
MRPS12	-0.12698	2.43949	-0.534292	0.596297	0.772211	-6.46322
LRRC47	-0.0730766	5.1839	-0.533846	0.596603	0.772211	-6.46346
UTP3	-0.0788121	4.7422	-0.533352	0.596941	0.772211	-6.46372
RBFOX2	-0.0442399	7.62448	-0.533255	0.597008	0.772211	-6.46377
BZW2	-0.117378	3.60719	-0.532098	0.597801	0.772582	-6.46439
KHDRBS2	0.267859	-4.0626	0.529296	0.599724	0.774087	-6.46588
MEX3C	-0.136227	4.49544	-0.528624	0.600186	0.774087	-6.46623
DDX52	-0.133103	4.14829	-0.528183	0.600489	0.774087	-6.46647
ADAD2	0.322972	-3.41321	0.527347	0.601063	0.774173	-6.46691
FAU	-0.253246	7.86647	-0.521157	0.605326	0.778284	-6.47015
MRPS34	0.173041	4.17594	0.520945	0.605472	0.778284	-6.47027
RPLP2	-0.231954	8.74962	-0.520186	0.605996	0.778284	-6.47066
DUS1L	0.133578	4.18035	0.519751	0.606296	0.778284	-6.47089
RBM5	0.0763509	7.1837	0.51895	0.606849	0.778339	-6.4713
METTL10	-0.0675722	4.53545	-0.514482	0.609938	0.781145	-6.47361
SMG9	0.103057	4.00841	0.514304	0.610061	0.781145	-6.47371
RTF1	0.0542439	6.18878	0.513529	0.610598	0.781176	-6.4741
PAPOLG	0.115585	4.64599	0.512225	0.611501	0.781676	-6.47477
RRBP1	-0.109537	8.65513	-0.51067	0.61258	0.782399	-6.47557
MRPS33	0.0695615	3.46074	0.504945	0.616556	0.786819	-6.47848
DHX38	0.0682797	5.79904	0.503559	0.617521	0.787391	-6.47918
HNRNPH2	-0.364881	-0.0598408	-0.50227	0.618418	0.787876	-6.47983
FTO	-0.0455808	6.18477	-0.500914	0.619363	0.788422	-6.48051
RBM4B	-0.150753	3.28828	-0.497587	0.621685	0.790716	-6.48218
PLRG1	-0.0525288	5.48111	-0.496766	0.622258	0.790786	-6.48258
RPL21	-0.279558	-0.492768	-0.495425	0.623195	0.791318	-6.48325
PA2G4	-0.0578229	5.58467	-0.490143	0.626892	0.79535	-6.48586
EIF3E	-0.147979	6.9355	-0.487939	0.628438	0.796648	-6.48694
PTRF	-0.0878441	7.99922	-0.486369	0.62954	0.796905	-6.4877
AGFG1	0.144227	6.27573	0.485665	0.630034	0.796905	-6.48805
SUPT4H1	0.120425	4.94372	0.485043	0.630471	0.796905	-6.48835
CLASRP	-0.111205	3.93826	-0.484674	0.630731	0.796905	-6.48853
HNRNPA1L2	-0.0628469	3.59569	-0.483468	0.631579	0.797093	-6.48911
PSMA6	0.0801557	4.33798	0.482975	0.631925	0.797093	-6.48935
FARSB	-0.0498817	5.08455	-0.476318	0.636615	0.802346	-6.49255
LARP7	0.102501	5.17028	0.474994	0.63755	0.80286	-6.49318
SUB1	0.0735649	5.431	0.472557	0.639272	0.804364	-6.49434
SNRNP70	-0.0990179	6.55784	-0.470393	0.640803	0.805626	-6.49536
FAM103A1	0.138326	0.731865	0.466075	0.643862	0.808805	-6.49739
PTRH1	0.10903	0.723522	0.463004	0.646041	0.810875	-6.49882
MRPL41	0.192989	3.70996	0.461972	0.646774	0.811127	-6.4993
HNRNPA0	0.140629	6.50507	0.459543	0.648501	0.812444	-6.50042
XPO7	0.047792	5.84613	0.458997	0.64889	0.812444	-6.50067
MARS	-0.0651342	5.59054	-0.454927	0.651788	0.815404	-6.50254
RNASE7	0.263076	-0.965187	0.447536	0.657066	0.821333	-6.50588
DZIP3	-0.115828	5.10614	-0.445589	0.658459	0.8224	-6.50675
LARS	-0.110729	6.34948	-0.44355	0.65992	0.822706	-6.50766
CRNKL1	0.101582	5.16641	0.443194	0.660175	0.822706	-6.50782
RBMXL2	-0.263109	-2.27645	-0.442187	0.660898	0.822706	-6.50827
INTS12	0.0755507	3.58072	0.441395	0.661466	0.822706	-6.50862
HNRNPUL1	-0.0772624	7.54727	-0.441374	0.66148	0.822706	-6.50863
PATL2	-0.207779	-0.71622	-0.440254	0.662284	0.822706	-6.50912
ISY1	-0.0576572	3.83173	-0.43998	0.662481	0.822706	-6.50924
IMP4	0.0475842	3.81923	0.434768	0.666226	0.826684	-6.51153
APOBEC2	0.103596	1.63056	0.432362	0.667958	0.828159	-6.51258
MRRF	0.0938106	4.12886	0.430485	0.669311	0.828831	-6.51339
FCF1	0.0407951	4.53431	0.430102	0.669587	0.828831	-6.51355
MRPS21	0.175021	5.73573	0.427808	0.671241	0.82971	-6.51454
SF3A3	0.0683473	5.20528	0.426913	0.671887	0.82971	-6.51493
ZCCHC14	0.0534094	6.45772	0.426855	0.671929	0.82971	-6.51495
MRPS18C	-0.0992486	2.22432	-0.426016	0.672535	0.829787	-6.51531
RBM28	-0.0688115	4.887	-0.422996	0.674717	0.831806	-6.5166
EIF1AX	-0.0713659	5.62185	-0.419073	0.677557	0.834606	-6.51825
RALYL	0.283857	-2.6605	0.418347	0.678083	0.834606	-6.51856
BZW1	-0.10506	7.01478	-0.415444	0.680188	0.836411	-6.51977
HARS2	0.0546631	4.72273	0.414812	0.680647	0.836411	-6.52004
QRSL1	0.0982254	3.41965	0.412447	0.682363	0.837845	-6.52102
TFIP11	-0.0575424	4.36487	-0.409545	0.684473	0.839759	-6.52221
ELAVL4	0.242171	-3.49145	0.40771	0.685808	0.840722	-6.52297
ABCE1	0.0900998	5.21669	0.405058	0.68774	0.842412	-6.52405
ABCF1	-0.0596237	5.38366	-0.40068	0.690933	0.845644	-6.52582
AARS2	-0.053217	3.9201	-0.398261	0.692699	0.846628	-6.52679
SRPR	-0.0336715	6.76669	-0.398059	0.692847	0.846628	-6.52687
TRPT1	-0.11935	3.40095	-0.387728	0.700412	0.854565	-6.53095
POLR2D	0.107944	3.21487	0.387659	0.700463	0.854565	-6.53097
MRPS5	0.0710962	4.66947	0.385406	0.702117	0.855117	-6.53185
SF3B5	0.115942	5.0981	0.385035	0.70239	0.855117	-6.53199
MTIF3	0.117138	5.11007	0.384085	0.703088	0.855117	-6.53236
DHX30	0.0456413	5.0371	0.383989	0.703158	0.855117	-6.5324
EIF2B5	-0.0403199	5.32144	-0.38138	0.705077	0.856766	-6.5334
UBA52	-0.179817	8.00915	-0.378999	0.706829	0.857479	-6.53431
RC3H2	-0.120635	5.14944	-0.378609	0.707116	0.857479	-6.53446
GPATCH1	-0.0593714	3.71556	-0.377753	0.707746	0.857479	-6.53478
NCBP1	-0.101993	5.39964	-0.37703	0.70828	0.857479	-6.53506
EXOSC8	0.0909062	4.372	0.376765	0.708475	0.857479	-6.53516
RNPS1	0.112533	5.28491	0.375219	0.709614	0.858178	-6.53574
TCERG1	-0.0992676	5.44831	-0.371197	0.712583	0.860766	-6.53725
C1D	0.0724628	2.03953	0.369317	0.713972	0.860766	-6.53795
RANBP17	0.144984	3.23889	0.369293	0.71399	0.860766	-6.53796
ILF3	-0.0420227	7.19705	-0.369262	0.714013	0.860766	-6.53797
UPF3B	-0.107757	4.51627	-0.363963	0.717933	0.864808	-6.53992
DHX37	-0.0822348	3.35443	-0.361138	0.720026	0.866	-6.54095
NSUN5	0.0760285	2.81584	0.361095	0.720057	0.866	-6.54096
RPL10L	-0.160569	-4.14168	-0.359347	0.721354	0.866875	-6.5416
PPIE	0.0606502	4.78579	0.356118	0.72375	0.86907	-6.54276
DUSP11	-0.0653675	4.35263	-0.354911	0.724647	0.869462	-6.54319
TDRD12	0.206983	-2.73843	0.353712	0.725539	0.869649	-6.54361
EXOSC10	-0.0508769	5.92004	-0.353168	0.725943	0.869649	-6.54381
PPP1R10	-0.0725544	5.96073	-0.348569	0.729365	0.872619	-6.54543
DHX58	-0.0793194	2.70866	-0.348298	0.729567	0.872619	-6.54552
THOC6	0.0874632	2.18564	0.347046	0.730499	0.87305	-6.54596
SNRPD2	0.0532907	5.41184	0.345073	0.73197	0.873559	-6.54665
PDE12	-0.0943075	3.95924	-0.344515	0.732386	0.873559	-6.54684
ZC3H13	-0.0809023	6.35988	-0.34417	0.732644	0.873559	-6.54696
RRP9	-0.064392	2.68268	-0.340583	0.735321	0.875755	-6.5482
RPS15A	-0.140604	7.46844	-0.339183	0.736367	0.875755	-6.54867
RPL31	-0.15705	9.08619	-0.338901	0.736577	0.875755	-6.54877
EIF4E1B	0.194159	-3.41531	0.338626	0.736783	0.875755	-6.54886
EIF4G3	0.0677995	6.49743	0.335871	0.738843	0.87656	-6.5498
SETD1A	-0.0885797	4.2699	-0.33492	0.739555	0.87656	-6.55012
DNAJC17	-0.0961458	2.68333	-0.333988	0.740252	0.87656	-6.55043
MRPS15	0.0629112	3.61078	0.332366	0.741467	0.87656	-6.55097
RPL26	-0.135464	8.49972	-0.332351	0.741477	0.87656	-6.55098
RPS19	-0.0786912	7.87629	-0.331345	0.742231	0.87656	-6.55132
HINT3	-0.048888	4.10362	-0.331327	0.742245	0.87656	-6.55132
RBMX	-0.0405057	7.25698	-0.330536	0.742837	0.87656	-6.55158
TRMT44	-0.0850357	2.41636	-0.330092	0.74317	0.87656	-6.55173
LSM11	-0.187206	1.27903	-0.329384	0.743701	0.87656	-6.55197
HNRNPA2B1	0.060651	9.07328	0.329274	0.743783	0.87656	-6.552
MIF4GD	0.0890152	1.89017	0.321653	0.749504	0.88047	-6.5545
PTBP1	-0.0760954	6.80481	-0.321406	0.74969	0.88047	-6.55458
MTPAP	-0.0506955	4.49808	-0.319553	0.751083	0.88047	-6.55517
RBM17	0.0336136	5.18239	0.319349	0.751236	0.88047	-6.55524
CWC15	0.0669525	5.46203	0.31926	0.751304	0.88047	-6.55527
ZFR2	0.233694	-3.22196	0.318395	0.751954	0.88047	-6.55554
SARNP	-0.0472844	4.48774	-0.31569	0.753991	0.88047	-6.55641
THUMPD3	0.0422367	5.35413	0.315641	0.754028	0.88047	-6.55642
PET112	0.0865286	2.019	0.315457	0.754166	0.88047	-6.55648
ZNF473	0.0678956	3.00611	0.315152	0.754396	0.88047	-6.55658
APOBEC3G	-0.0764001	1.524	-0.314878	0.754602	0.88047	-6.55666
REPIN1	-0.0569491	4.27959	-0.314751	0.754697	0.88047	-6.5567
DHX57	-0.0676964	4.54319	-0.314538	0.754858	0.88047	-6.55677
RPL32	-0.151468	8.88325	-0.314107	0.755183	0.88047	-6.55691
ERAL1	0.0461663	3.55513	0.31296	0.756047	0.880633	-6.55727
NOL7	-0.0955857	5.92532	-0.311863	0.756874	0.880633	-6.55762
CMSS1	-0.0412235	3.90276	-0.311622	0.757056	0.880633	-6.55769
PTCD3	0.0316513	5.81683	0.310621	0.757811	0.88084	-6.558
DDX10	-0.0651703	4.40479	-0.309487	0.758667	0.881163	-6.55836
SETD1B	-0.0893781	4.67582	-0.304399	0.762509	0.884351	-6.55993
YTHDF2	-0.0327888	5.29011	-0.304317	0.762571	0.884351	-6.55995
YTHDF1	-0.0519242	5.71653	-0.298408	0.767041	0.888859	-6.56174
MRPS28	0.052483	3.45265	0.296742	0.768303	0.889644	-6.56224
GUF1	0.0750133	4.39748	0.29491	0.769691	0.890576	-6.56279
LSMD1	0.164256	4.62494	0.29359	0.770692	0.891058	-6.56318
MRPL54	-0.051478	3.09342	-0.292229	0.771725	0.891576	-6.56358
ZCCHC3	0.0431575	4.07458	0.289867	0.773517	0.8927	-6.56427
L1TD1	-0.188193	-2.38056	-0.28924	0.773993	0.8927	-6.56445
RIOK2	0.0618422	4.54523	0.288633	0.774454	0.8927	-6.56463
MRPL23	-0.0777644	3.4214	-0.287256	0.7755	0.893231	-6.56503
RPS4Y2	0.0684193	-4.43687	0.285592	0.776764	0.894012	-6.56551
ZRSR2	-0.0888869	3.91989	-0.282791	0.778895	0.895787	-6.56631
AFF3	-0.0860711	6.15358	-0.279778	0.781188	0.896499	-6.56716
HELZ2	0.0606425	3.43153	0.279303	0.781549	0.896499	-6.5673
LIN28B	0.195223	-2.66444	0.278723	0.781991	0.896499	-6.56746
EXOSC3	-0.0530661	3.84786	-0.278721	0.781992	0.896499	-6.56746
QTRT1	-0.0453096	3.00607	-0.278116	0.782453	0.896499	-6.56763
INTS4	0.027725	4.69764	0.275834	0.784192	0.897818	-6.56827
DICER1	0.0547234	7.2954	0.271656	0.787378	0.900621	-6.56942
MRPS24	-0.182252	-2.94594	-0.271075	0.787822	0.900621	-6.56957
ZC3H12D	0.139688	0.324116	0.2697	0.788872	0.901146	-6.56995
EWSR1	-0.0241113	6.80984	-0.268726	0.789616	0.901257	-6.57021
SETX	0.0867945	7.31799	0.268025	0.790151	0.901257	-6.5704
PAPOLB	-0.106353	0.155076	-0.266946	0.790975	0.901523	-6.57069
RPS24	0.085777	8.80095	0.264667	0.792718	0.902834	-6.5713
GATC	-0.0307201	4.83636	-0.260465	0.795932	0.905818	-6.57241
MRPS31	-0.0502902	3.8987	-0.259521	0.796655	0.905965	-6.57266
SF3B4	0.0842653	3.2113	0.253768	0.801063	0.910033	-6.57415
DND1	0.16347	-0.203989	0.253295	0.801426	0.910033	-6.57427
RPS12	-0.121674	8.51135	-0.252462	0.802065	0.910081	-6.57448
RBM38	-0.0535696	1.1279	-0.251209	0.803026	0.910494	-6.5748
ACIN1	-0.0674604	6.36105	-0.249014	0.804711	0.911726	-6.57535
MRPS25	-0.0397428	4.38286	-0.247711	0.805711	0.912182	-6.57567
SRPK2	-0.0797305	4.76973	-0.243454	0.808983	0.915207	-6.57673
EIF2AK1	0.0402941	5.93477	0.241524	0.810466	0.916205	-6.5772
TBL3	-0.047973	2.99519	-0.238172	0.813046	0.918345	-6.57801
RPS16	-0.110903	7.962	-0.2375	0.813564	0.918345	-6.57817
IPO11	0.106839	3.23643	0.236077	0.814659	0.918902	-6.57851
ANGEL1	-0.0371286	3.88025	-0.23479	0.815651	0.918928	-6.57881
PARP12	0.0523949	3.57774	0.234038	0.81623	0.918928	-6.57899
DIS3L2	0.0382366	4.11385	0.233701	0.81649	0.918928	-6.57907
RRP1	0.0367421	3.33315	0.231205	0.818415	0.920415	-6.57965
DDX1	-0.0667828	6.10502	-0.223856	0.824086	0.92611	-6.58134
CPSF1	0.0484553	5.22361	0.221878	0.825615	0.927007	-6.58178
NANOS2	0.0908842	-4.18578	0.221249	0.8261	0.927007	-6.58192
PURG	0.132503	-3.75993	0.219983	0.827079	0.927423	-6.5822
FAM120C	0.0379339	4.75653	0.217574	0.828942	0.92883	-6.58273
CELF5	-0.146388	-2.95331	-0.216099	0.830083	0.929425	-6.58306
DDX39B	0.119716	-2.48401	0.213496	0.832098	0.930998	-6.58362
POLR2H	-0.0656107	4.70029	-0.210954	0.834067	0.931877	-6.58416
ARL6IP4	-0.0544886	6.23715	-0.210607	0.834336	0.931877	-6.58424
RTCA	-0.0281107	4.90096	-0.210115	0.834717	0.931877	-6.58434
FAM98C	0.0814931	2.9691	0.206589	0.83745	0.934244	-6.58508
RBM42	-0.0434663	4.49228	-0.201387	0.841486	0.937886	-6.58615
DCP1B	-0.0624463	3.60623	-0.200795	0.841945	0.937886	-6.58627
TDRD10	0.0749628	0.572238	0.198613	0.84364	0.938407	-6.58671
PRIM1	0.057497	1.60072	0.198609	0.843643	0.938407	-6.58671
SFPQ	-0.0513102	7.49381	-0.196922	0.844953	0.939028	-6.58704
RNASE10	-0.034855	-4.52146	-0.195983	0.845683	0.939028	-6.58723
ZFP36L2	-0.0733124	7.13622	-0.195512	0.846049	0.939028	-6.58732
TAF15	-0.0924863	6.31472	-0.191246	0.849366	0.942024	-6.58815
HNRNPM	-0.0374548	7.25009	-0.189092	0.851042	0.943197	-6.58857
TGS1	-0.0243929	5.05272	-0.188073	0.851835	0.94339	-6.58876
RBMXL3	-0.103172	-3.22979	-0.186588	0.852991	0.943985	-6.58904
DRG2	-0.042257	4.43271	-0.184687	0.854471	0.944408	-6.5894
XRN2	-0.0249336	6.3194	-0.184506	0.854612	0.944408	-6.58943
EXOSC5	-0.0492509	1.45068	-0.182199	0.85641	0.945709	-6.58986
CALR3	-0.0995246	-2.76916	-0.178598	0.859216	0.947666	-6.59051
CANX	-0.025568	9.40785	-0.178095	0.859608	0.947666	-6.5906
PTRH2	-0.0414401	3.70519	-0.177285	0.86024	0.947666	-6.59075
CELF4	0.0618799	0.4114	0.176737	0.860667	0.947666	-6.59084
SNRPN	0.068135	-4.25115	0.17261	0.863887	0.950438	-6.59157
RPL27	0.0717417	7.69259	0.171215	0.864977	0.950438	-6.59181
C9orf114	-0.0357094	4.41728	-0.171116	0.865054	0.950438	-6.59183
DDX20	-0.0288457	3.6287	-0.169861	0.866034	0.950829	-6.59204
RPS29	0.109802	7.73152	0.167041	0.868236	0.952561	-6.59252
SMAD2	-0.0570413	6.39688	-0.165985	0.869062	0.952782	-6.5927
SRBD1	0.0418505	4.63365	0.162353	0.871901	0.955207	-6.5933
MRPL32	-0.0516522	4.98129	-0.158269	0.875095	0.958019	-6.59396
ADARB1	-0.0351961	5.67932	-0.15193	0.880058	0.962295	-6.59495
MRPL43	0.0665146	5.03688	0.150308	0.881328	0.962295	-6.5952
ERI3	-0.0189184	4.85048	-0.149701	0.881804	0.962295	-6.59529
LARP4B	0.0173807	5.76038	0.14884	0.882479	0.962295	-6.59542
PNRC2	-0.0219351	5.74497	-0.148791	0.882517	0.962295	-6.59543
TUFM	-0.0337069	5.29029	-0.148169	0.883005	0.962295	-6.59552
DHX8	-0.036366	4.90907	-0.14764	0.883419	0.962295	-6.5956
TRMT112	0.0645369	5.68064	0.146038	0.884675	0.962552	-6.59584
PUS7L	0.0625005	4.05056	0.14573	0.884916	0.962552	-6.59588
INTS2	-0.0201267	4.73546	-0.144583	0.885816	0.962703	-6.59605
CXorf23	-0.0462471	4.28616	-0.143518	0.886651	0.962703	-6.5962
SNRPB	-0.0222764	4.31112	-0.143137	0.886949	0.962703	-6.59626
RNASE13	-0.0871246	-0.463201	-0.139447	0.889844	0.965158	-6.59678
FARS2	0.0164889	3.51059	0.138599	0.890509	0.965193	-6.5969
POLR2I	-0.0564651	3.78699	-0.136865	0.891871	0.965693	-6.59714
EEFSEC	-0.035275	3.20139	-0.136398	0.892237	0.965693	-6.59721
PIH1D2	-0.0531734	0.503329	-0.134858	0.893446	0.966316	-6.59742
DDX31	-0.0167982	4.07304	-0.132344	0.89542	0.96638	-6.59776
RPS10	-0.0744324	4.23123	-0.132191	0.895541	0.96638	-6.59778
EIF3K	-0.0505897	6.35951	-0.132079	0.895629	0.96638	-6.59779
RPS2	0.0698663	7.52113	0.131556	0.89604	0.96638	-6.59786
MRPL46	-0.0285727	3.20564	-0.130575	0.896811	0.966456	-6.59799
DZIP1L	0.0373992	4.93605	0.129458	0.897688	0.966456	-6.59814
EEF1A2	-0.0813515	-3.22336	-0.129047	0.898011	0.966456	-6.59819
DQX1	-0.0753702	-1.72377	-0.126999	0.899621	0.967505	-6.59845
PRPF18	0.0176967	4.35382	0.124917	0.901258	0.967986	-6.59872
RPS4X	-0.0347012	9.99617	-0.12313	0.902663	0.967986	-6.59894
HNRNPA1	0.0336899	6.117	0.12294	0.902812	0.967986	-6.59897
EIF4G1	0.044925	6.72125	0.122735	0.902973	0.967986	-6.59899
RBM46	0.0867388	-2.93188	0.121251	0.904141	0.967986	-6.59917
THUMPD2	-0.0164661	3.87493	-0.120432	0.904785	0.967986	-6.59927
DKC1	-0.023951	4.56795	-0.11998	0.90514	0.967986	-6.59933
PTGES3L-AARSD1	-0.0419225	-4.35028	-0.117798	0.906857	0.967986	-6.59959
PSPC1	0.0139613	5.48193	0.117557	0.907047	0.967986	-6.59962
PTCD2	0.0326705	2.32292	0.116687	0.907732	0.967986	-6.59972
GEMIN8	-0.0217461	3.39543	-0.116229	0.908092	0.967986	-6.59977
QARS	0.0163869	6.15621	0.116099	0.908195	0.967986	-6.59979
DAZAP1	0.0239367	5.06863	0.114597	0.909377	0.967986	-6.59996
RBFOX3	-0.0512149	-0.859463	-0.1144	0.909532	0.967986	-6.59999
SHQ1	-0.019289	4.25789	-0.113661	0.910114	0.967986	-6.60007
IFIT3	-0.0177943	3.53974	-0.11352	0.910224	0.967986	-6.60009
ZNF579	0.0370633	2.9352	0.112585	0.910961	0.968095	-6.6002
RRNAD1	-0.0200438	4.00753	-0.106189	0.915999	0.97185	-6.6009
TAF9	0.0260711	5.33311	0.105198	0.916781	0.97185	-6.60101
NSUN6	0.019257	4.35385	0.104775	0.917114	0.97185	-6.60105
FAM120A	-0.0269495	6.1634	-0.104711	0.917164	0.97185	-6.60106
PABPN1	-0.0338605	2.89304	-0.103102	0.918432	0.97185	-6.60123
DBR1	0.0116415	3.70363	0.102684	0.918762	0.97185	-6.60127
RPL22	0.0346963	7.06763	0.101798	0.91946	0.97185	-6.60136
PPIL3	0.0174019	4.45175	0.10163	0.919593	0.97185	-6.60138
RPL37A	0.0579856	9.5857	0.100756	0.920282	0.971904	-6.60147
NARS	0.00834425	6.4432	0.0982451	0.922262	0.973321	-6.60172
EFTUD1	0.0360274	3.76549	0.0922143	0.927019	0.977666	-6.6023
RPS23	-0.0441094	8.52843	-0.0889001	0.929635	0.979747	-6.6026
AIMP2	0.0384936	1.02058	0.0835961	0.933823	0.983481	-6.60306
EARS2	0.0178448	3.80117	0.0792275	0.937274	0.985946	-6.60342
UNK	0.0200397	5.77411	0.0786072	0.937764	0.985946	-6.60347
PURA	0.0153786	6.24233	0.0781775	0.938103	0.985946	-6.6035
POLR2J3	-0.0393588	0.960823	-0.0734396	0.941847	0.988716	-6.60387
EED	0.0109727	3.89317	0.0732008	0.942036	0.988716	-6.60388
MEX3A	-0.0168078	2.43783	-0.0710658	0.943724	0.989806	-6.60404
TLR3	-0.0192516	3.07542	-0.0688401	0.945483	0.990921	-6.6042
RPS15	0.0442138	6.41699	0.0680707	0.946092	0.990921	-6.60425
NOP2	0.0147891	4.04377	0.0663999	0.947413	0.990921	-6.60436
ANGEL2	0.00893488	5.3722	0.0660369	0.9477	0.990921	-6.60439
RBM3	-0.0108148	7.76497	-0.0656128	0.948035	0.990921	-6.60441
PRKRA	0.0065826	5.17718	0.0632625	0.949894	0.992184	-6.60457
PCF11	-0.0155842	6.43936	-0.0615349	0.951261	0.992707	-6.60468
HEATR1	-0.0268553	4.98443	-0.060449	0.95212	0.992707	-6.60474
NXF5	-0.030281	-3.57021	-0.0594449	0.952914	0.992707	-6.6048
SAP18	0.0129589	6.5537	0.0593374	0.952999	0.992707	-6.60481
MBNL3	-0.0159586	3.60291	-0.0576892	0.954303	0.993067	-6.60491
MRPL44	-0.00872208	3.54877	-0.0572552	0.954646	0.993067	-6.60493
PRPF40A	0.00695568	6.57679	0.055649	0.955917	0.993232	-6.60502
HNRNPL	-0.00587926	6.3768	-0.0554076	0.956108	0.993232	-6.60504
ALKBH8	-0.0128329	3.60897	-0.053899	0.957302	0.993796	-6.60512
ZC3H12C	-0.0196151	3.6634	-0.0525013	0.958408	0.994267	-6.60519
PPAN	-0.0198684	1.73353	-0.0513224	0.959341	0.994559	-6.60526
ZC3H3	-0.00909364	2.69285	-0.0502857	0.960162	0.994733	-6.60531
IREB2	-0.00755151	5.85631	-0.048719	0.961402	0.995342	-6.60539
RNASEH1	-0.00948904	3.19468	-0.0454174	0.964016	0.996343	-6.60554
RPP30	-0.00504289	4.09721	-0.0446225	0.964645	0.996343	-6.60558
HNRNPK	-0.00605232	8.17599	-0.044171	0.965003	0.996343	-6.6056
CHTOP	0.00704232	5.44436	0.0439686	0.965163	0.996343	-6.60561
EIF2AK2	0.0126072	5.33917	0.0433714	0.965636	0.996343	-6.60564
ANKRD17	-0.00695709	7.34973	-0.0410782	0.967452	0.997196	-6.60573
EIF1AD	0.00904722	3.73206	0.0406755	0.967771	0.997196	-6.60575
DUS4L	-0.00667713	2.46186	-0.0390813	0.969033	0.997823	-6.60581
CAPRIN1	-0.00883283	6.91483	-0.0340259	0.973037	1	-6.606
EIF2S3	-0.00401929	7.21766	-0.0327323	0.974062	1	-6.60604
EDC3	-0.00574065	4.52942	-0.030708	0.975665	1	-6.60611
YBX1	0.00596546	6.49734	0.0305745	0.975771	1	-6.60611
RARS	0.00363256	6.31291	0.0280369	0.977782	1	-6.60619
ZC3H18	0.00409631	4.4997	0.0252157	0.980017	1	-6.60626
MRPS26	0.00534354	3.97817	0.0246807	0.980441	1	-6.60628
LIN28A	0.0147283	-2.20537	0.0244067	0.980658	1	-6.60628
MRM1	-0.0093718	1.65153	-0.0237019	0.981216	1	-6.6063
RAVER2	0.00485921	3.82336	0.0224441	0.982213	1	-6.60633
RPL28	0.0105252	7.0111	0.0194897	0.984554	1	-6.60639
RPP21	0.0135664	-0.824328	0.0178391	0.985862	1	-6.60642
DDX26B	0.00247071	5.50683	0.0134519	0.989339	1	-6.60649
BYSL	-0.00527946	1.91298	-0.0126847	0.989947	1	-6.6065
PDCD11	0.00285143	4.90612	0.0123278	0.99023	1	-6.60651
ZC3H8	-0.00214994	4.17957	-0.0116301	0.990782	1	-6.60652
RNASE12	0.00278758	-4.47142	0.0113028	0.991042	1	-6.60652
DDX19A	-0.0011914	4.71778	-0.0107825	0.991454	1	-6.60653
RNGTT	0.00255387	4.10199	0.00806916	0.993605	1	-6.60655
PARP4	-0.0020483	5.60375	-0.0079457	0.993702	1	-6.60655
U2AF1	-0.00208222	5.48997	-0.00693771	0.994501	1	-6.60656
DDX60	0.00309557	3.0381	0.00629571	0.99501	1	-6.60656
RPL7A	0.00104677	8.13843	0.00293087	0.997677	1	-6.60658
ZC3H14	0.000287038	6.07059	0.0028279	0.997759	1	-6.60658
RPL7L1	0.000273708	3.14435	0.000759271	0.999398	1	-6.60658
DAZ1	-1.5e-08	-4.64759	-5.45e-07	1	1	-6.60658
DAZ2	-1.5e-08	-4.64759	-5.45e-07	1	1	-6.60658
DAZ3	-1.5e-08	-4.64759	-5.45e-07	1	1	-6.60658
DAZ4	-1.5e-08	-4.64759	-5.45e-07	1	1	-6.60658
EIF4A1	-1.5e-08	-4.64759	-5.45e-07	1	1	-6.60658
NXF2B	-1.5e-08	-4.64759	-5.45e-07	1	1	-6.60658
NXF2	-1.5e-08	-4.64759	-5.45e-07	1	1	-6.60658
RBMY1A1	-1.5e-08	-4.64759	-5.45e-07	1	1	-6.60658
RBMY1B	-1.5e-08	-4.64759	-5.45e-07	1	1	-6.60658
RBMY1D	-1.5e-08	-4.64759	-5.45e-07	1	1	-6.60658
RBMY1E	-1.5e-08	-4.64759	-5.45e-07	1	1	-6.60658
RBMY1F	-1.5e-08	-4.64759	-5.45e-07	1	1	-6.60658
RBMY1J	-1.5e-08	-4.64759	-5.45e-07	1	1	-6.60658
EIF3C	-1.5e-08	-4.64759	-5.45e-07	1	1	-6.60658
EIF3CL	-1.5e-08	-4.64759	-5.45e-07	1	1	-6.60658
RPS17	-1.5e-08	-4.64759	-5.45e-07	1	1	-6.60658
RPS17L	-1.5e-08	-4.64759	-5.45e-07	1	1	-6.60658
SMN1	-1.5e-08	-4.64759	-5.45e-07	1	1	-6.60658
SMN2	-1.5e-08	-4.64759	-5.45e-07	1	1	-6.60658
